# Supplementary material
Source: PubMed Central journal article supplement (PMC8266668)
Supplement: sbab022_suppl_supplementary_materials.pdf [file sbab022_suppl_supplementary_materials.pdf]

## **Supplementary Information:**

### **A meta-analysis of cognitive remediation for schizophrenia: Efficacy and the role of participant and treatment factors**

Julia A. Lejeune, B.A., Andrew Northrop, Candidate for B.A., & Matthew M. Kurtz, PhD

#### **Supplement 1: Search Strings used for Literature Search**

##### **December 2018 Search Strings:**

###### **PubMed (Legacy)**

(Schizo\* OR psychosis) AND (neurocogn\* OR “cognitive rehabilitation”) AND (remediation OR training).

Filters: English language, Publication date: 1980 to present

###### **PsycINFO (via EbscoHost)**

(Schizo\* OR psychosis) AND (neurocogn\* OR “cognitive rehabilitation”) AND (remediation OR training).

Filters: English language, Publication date: 1980 to present

##### **May 2020 Search Strings:**

###### **PubMed (Legacy)**

(Psychotic disorders [Mesh] OR Schizophrenia [Mesh] OR schizophrenia [tw]) AND (Cognitive Remediation [Mesh] OR cognitive remediation [tw] OR cognitive training [tw] OR cognitive rehabilitation [tw] OR cognitive enhancement [tw] OR cognitive intervention [tw] OR cognitive therapy [tw] OR neurocognitive remediation [tw] OR neurocognitive training [tw] OR neurocognitive rehabilitation [tw] OR neurocognitive enhancement [tw] OR neurocognitive intervention [tw] OR neurocognitive therapy [tw]) AND (randomized controlled trial[pt] OR controlled clinical trial[pt] OR randomized[tiab] OR placebo[tiab] OR drug therapy[sh] OR randomly[tiab] OR trial[tiab] OR groups[tiab] NOT (animals [mh] NOT humans [mh]))

Filters: English language, Publication date: 1980 to present

## PsycINFO (via EbscoHost)

(DE "Schizophrenia" OR DE "Acute Schizophrenia" OR DE "Catatonic Schizophrenia" OR DE "Childhood Schizophrenia" OR DE "Paranoid Schizophrenia" OR DE "Process Schizophrenia" OR DE "Schizoaffective Disorder" OR DE "Schizophrenia (Disorganized Type)" OR DE "Schizophreniform Disorder" OR DE "Undifferentiated Schizophrenia") AND (TI "cognitive remediation" OR AB "cognitive remediation" OR KW "cognitive remediation" OR TI "cognitive training" OR AB "cognitive training" OR KW "cognitive training" OR TI "cognitive rehabilitation" OR AB "cognitive rehabilitation" OR KW "cognitive rehabilitation" OR TI "cognitive enhancement" OR AB "cognitive enhancement" OR KW "cognitive enhancement" OR TI "cognitive intervention" OR AB "cognitive intervention" OR KW "cognitive intervention" OR TI "cognitive therapy" OR AB "cognitive therapy" OR KW "cognitive therapy" OR TI "neurocognitive remediation" OR AB "neurocognitive remediation" OR KW "neurocognitive remediation" OR TI "neurocognitive training" OR AB "neurocognitive training" OR KW "neurocognitive training" OR TI "neurocognitive rehabilitation" OR AB "neurocognitive rehabilitation" OR KW "neurocognitive rehabilitation" OR TI "neurocognitive enhancement" OR AB "neurocognitive enhancement" OR KW "neurocognitive enhancement" OR TI "neurocognitive intervention" OR AB "neurocognitive intervention" OR KW "neurocognitive intervention" OR TI "neurocognitive therapy" OR AB "neurocognitive therapy" OR KW "neurocognitive therapy") AND (DE "Treatment Effectiveness Evaluation" OR DE "Treatment Outcomes" OR DE "Psychotherapeutic Outcomes" OR DE "Side Effects (Treatment)" OR DE "Treatment Compliance" OR DE "Treatment Duration" OR DE "Treatment Refusal" OR DE "Treatment Termination" OR DE "Treatment Withholding" OR DE "Placebo" OR DE "Followup Studies" OR TI "placebo\*" OR AB "placebo\*" OR KW "placebo\*" OR TI "random\*" OR AB "random\*" OR KW "random\*" OR TI "comparative stud\*" OR AB "comparative stud\*" OR KW "comparative stud\*" OR ((TI "clinical" OR AB "clinical" OR KW "clinical") AND (TI "trial\*" OR AB "trial\*" OR KW "trial\*")) OR ((TI "research" OR AB "research" OR KW "research") AND (TI "design" OR AB "design" OR KW "design")) OR ((TI "evaluat\*" OR AB "evaluat\*" OR KW "evaluat\*") AND (TI "stud\*" OR AB "stud\*" OR KW "stud\*")) OR ((TI "prospectiv\*" OR AB "prospectiv\*" OR KW "prospectiv\*") AND (TI "stud\*" OR AB "stud\*" OR KW "stud\*")) OR ((TI "singl\*" OR AB "singl\*" OR KW "singl\*" OR TI "doubl\*" OR AB "doubl\*" OR KW "doubl\*" OR TI "trebl\*" OR AB "trebl\*" OR KW "trebl\*" OR TI "tripl\*" OR AB "tripl\*" OR KW "tripl\*") AND (TI "blind\*" OR AB "blind\*" OR KW "blind\*" OR TI "mask\*" OR AB "mask\*" OR KW "mask\*"))))

Filters: English language, Publication date: 1980 to present.

## Supplement 2: Table of Included Tests Grouped by Outcome Domain

|                                                                                                                                                                                                                                                                                                                                                                                                                                 |                                                                                                                                                                                                                                                                                                                                                                                                                                                                                                                                                                 |                                                                                                                                                                                                                                                                                                                                                                                                                                                                                                                                                                                                            |                                                                                                                                                                                                                                                                                                                                                                                                                                                                                                                                                                                                                                                                                                                                                                                  |
|---------------------------------------------------------------------------------------------------------------------------------------------------------------------------------------------------------------------------------------------------------------------------------------------------------------------------------------------------------------------------------------------------------------------------------|-----------------------------------------------------------------------------------------------------------------------------------------------------------------------------------------------------------------------------------------------------------------------------------------------------------------------------------------------------------------------------------------------------------------------------------------------------------------------------------------------------------------------------------------------------------------|------------------------------------------------------------------------------------------------------------------------------------------------------------------------------------------------------------------------------------------------------------------------------------------------------------------------------------------------------------------------------------------------------------------------------------------------------------------------------------------------------------------------------------------------------------------------------------------------------------|----------------------------------------------------------------------------------------------------------------------------------------------------------------------------------------------------------------------------------------------------------------------------------------------------------------------------------------------------------------------------------------------------------------------------------------------------------------------------------------------------------------------------------------------------------------------------------------------------------------------------------------------------------------------------------------------------------------------------------------------------------------------------------|
| <p><b>Attention/Vigilance</b><br/>         Matric Consensus Cognitive Battery (MCCB) Attention<br/>         CPT (various forms)<br/>         Stroop color or word test score<br/>         Digit Vigilance Test<br/>         d2 Test of Attention<br/>         Scanning Test for Sustained Attention<br/>         Sustained Attention Test<br/>         mean duration of attentiveness<br/>         Letter Cancellation Test</p> | <p><b>Reasoning/Problem Solving</b><br/>         MCCB Reasoning<br/>         Wisconsin Card Sorting Test (WCST)<br/>         Brief Assessment of Cognition (BACS)<br/>         Tower of London<br/>         BACS Problem Solving Domain<br/>         Strategic Target Detection Test (STDT)<br/>         Delis-Kaplan Executive Function Scale (DKEFS): Tower Test<br/>         DKEFS: Sorting Test<br/>         Stroop Test Interference condition<br/>         Penn Conditional Exclusion Test (PCET)<br/>         MCCB Mazes<br/>         Tower of Hanoi</p> | <p><b>Working Memory</b><br/>         MCCB Working Memory<br/>         BACS Digit Sequencing<br/>         Digit Span - backward<br/>         MCCB LNS<br/>         Trailmaking Test Part B (TMTB)<br/>         TMT B-TMT A<br/>         Letter-Number Sequencing Task<br/>         Auditory Number Sequencing<br/>         Digit Span Backward<br/>         WMS-III Digit Span<br/>         WAIS, WAIS-R, WAIS-III, WAIS-IV<br/>         Digit Span<br/>         N-Back Test<br/>         Digit Span Distractibility Test: distractibility condition<br/>         WAIS-III Forward Digit Span</p>          | <p><b>Verbal Learning and Memory</b><br/>         Hong Kong List Learning Test<br/>         BACS List Learning<br/>         WMS, WMS-R, WMS-III Logical Memory<br/>         Word List Recall Test<br/>         MCCB Verbal learning<br/>         Auditory Verbal Learning Test<br/>         BACS Verbal Memory<br/>         Word List Memory Test<br/>         WMS Logical Memory Immediate<br/>         Hopkins Verbal Learning Test<br/>         MCCB Verbal Learning and Memory<br/>         California Verbal Learning<br/>         Rey Auditory Verbal Learning Test<br/>         RBANS- Immediate Memory<br/>         Spain-Complutence Verbal Learning Test<br/>         Rivermead Behavioral Memory Test: Story Recall<br/>         Grober and Buschke Learning Test</p> |
| <p><b>Visual Learning and Memory</b><br/>         MCCB Visual Learning<br/>         Picture Memory and Interference Test<br/>         Face Memory Test<br/>         Rey Osterreith Complex Figure Test: Recall<br/>         WMS-III Faces<br/>         WMS, WMS-III Visual reproduction<br/>         Spatial Episodic Memory<br/>         Visual Span Test</p>                                                                  | <p><b>Processing speed</b><br/>         MCCB Speed of Processing<br/>         BACS Verbal Fluency<br/>         Trailmaking Test A<br/>         Semantic Fluency (category Instances)<br/>         Letter fluency<br/>         BACS Processing Speed Domain<br/>         Digit Symbol<br/>         Comprehensive Trail Making Test Trials 1-4</p>                                                                                                                                                                                                                | <p><b>Social Cognition</b><br/>         MCCB Social Cognition<br/>         MCCB MSCEIT (Managing Emotions)<br/>         Reading the Mind in the Eyes Test<br/>         Hinting Task<br/>         Facial Affect Recognition</p>                                                                                                                                                                                                                                                                                                                                                                             | <p><b>Global Cognition</b><br/>         Global Cognition (derived by the investigator from average of tests in specific study)<br/>         MCCB Global Cognition<br/>         BACS-J Composite Score<br/>         RBANS Total<br/>         BACS Total</p>                                                                                                                                                                                                                                                                                                                                                                                                                                                                                                                       |
| <p><b>Depression</b><br/>         PANSS Depression<br/>         Beck Depression Inventory-II (BDI-II)<br/>         BPRS Depression/Anxiety<br/>         Calgary Depression Scale for Schizophrenia (CDSS)<br/>         Center for Epidemiologic Studies-Depression Scale<br/>         Hamilton Depression Rating Scale (HAM-D)</p>                                                                                              | <p><b>Total Symptoms</b><br/>         Brief Psychiatric Rating Scale (BPRS)<br/>         Positive and Negative Syndrome Scale (PANSS)</p>                                                                                                                                                                                                                                                                                                                                                                                                                       | <p><b>Positive Symptoms</b><br/>         PANSS positive<br/>         Scale for the Assessment of Positive Symptoms</p> <p><b>Negative Symptoms</b><br/>         PANSS negative<br/>         Scale for the Assessment of Negative Symptoms</p>                                                                                                                                                                                                                                                                                                                                                              |                                                                                                                                                                                                                                                                                                                                                                                                                                                                                                                                                                                                                                                                                                                                                                                  |
| <p><b>Recovery</b><br/>         Maryland Assessment of Recovery in Serious Mental Illness (MARS)<br/>         Revised Self Efficacy Scale<br/>         Self-Efficacy Scale: Self-Esteem<br/>         Quality of Life: subjective QOL<br/>         Rosenberg self-esteem<br/>         Self-Efficacy - Social Situations Subscale<br/>         Quality of Life Interview (Global Life Satisfaction)</p>                           | <p><b>Functional Capacity</b><br/>         UCSD Performance-Based Skills Assessment (UPSA, UPSA-B)<br/>         Ecological tests<br/>         Assessment of Interpersonal Problem-Solving Scale (AIPSS)</p>                                                                                                                                                                                                                                                                                                                                                     | <p><b>Functional Outcome</b><br/>         Global Assessment of Function (GAF)<br/>         EUROHIS-QOL (Euro Health Interview Survey QOL)<br/>         Heinrich's and Lehman Quality of Life Scale<br/>         Personal and Social Performance Scale<br/>         Independent Living Skills (ILS)<br/>         Independent Living Skills, Problem Solving (ILS-PS)<br/>         Social and Occupational Functional Assessment Scale (SOFAS)<br/>         Strauss-Carpenter Level of Function Scale<br/>         LASMI work<br/>         Teacher Assessment: Composite Score<br/>         Hours Worked</p> | <p>Work Behavior Inventory<br/>         Scale of Social Skills of chronic schizophrenia Inpatient Score (SSSI)<br/>         Global Assessment of Function<br/>         Nurse Observation Scale Inpatient Evaluation (NOSIE)<br/>         Social Behavior Schedule (SBS)<br/>         Life Skills Profile Total Score<br/>         Quality of Life EQ-5D<br/>         Hours per week in structured activity<br/>         Social and work activities<br/>         Independent Living Skills Inventory<br/>         Social Behavior Schedule</p>                                                                                                                                                                                                                                    |

### Supplement 3: Demographic, Study, and Treatment Characteristics of Included Studies

| Study Citation; Country                            | Sample Characteristics: Mean age (years); Mean education (years); Mean duration of illness (years); % male | Clinical Status of Sample (Inpatient, Outpatient, or Mixed) | Total Participant Sample Size | CR Program Name                                                             | Remediation Approach (drill and practice vs. drill and strategy) | Computer Exposure (Yes/No) | Therapist Exposure During CR (yes/no) | Adjunctive Strategy Coaching (Yes/No) | Weekly bridging group (Yes/No) | Size of CR Sessions (Group vs. Individual) | Nature of Adjective Psychiatric Rehabilitation (None/Not Evidence-Based/ Evidence-Based) | Aim for Duration of Treatment (Hours) | Number of CR Sessions per Week | Type of Control (Active vs. Passive) | CTAM Score |
|----------------------------------------------------|------------------------------------------------------------------------------------------------------------|-------------------------------------------------------------|-------------------------------|-----------------------------------------------------------------------------|------------------------------------------------------------------|----------------------------|---------------------------------------|---------------------------------------|--------------------------------|--------------------------------------------|------------------------------------------------------------------------------------------|---------------------------------------|--------------------------------|--------------------------------------|------------|
| Ahmed et al., 2015; USA <sup>1</sup>               | 40.5; 9.84; NR; 87.32                                                                                      | Inpatient                                                   | 78                            | Brain HQ/ Brain Fitness                                                     | Drill and practice                                               | Yes                        | Yes                                   | No                                    | Yes                            | Group                                      | None                                                                                     | 40                                    | 3                              | Active                               | 76         |
| Au et al., 2015; Hong Kong <sup>2</sup>            | 36.14; 14.95; 11.21; 63.33                                                                                 | Outpatient                                                  | 90                            | Combination Strong Arm System and Captain's Log                             | Drill and practice                                               | Yes                        | No                                    | No                                    | No                             | Individual                                 | Evidence-Based                                                                           | 72                                    | 3                              | Active                               | 76         |
| Balzan et al., 2019; Australia <sup>3</sup>        | 37.21; 11.41; 11.11; 59.5                                                                                  | Outpatient                                                  | 54                            | HappyNeuron Pro                                                             | Drill and practice                                               | Yes                        | Yes                                   | No                                    | No                             | Individual                                 | None                                                                                     | 7                                     | 1                              | Active                               | 69         |
| Bellucci et al., 2002; USA <sup>4</sup>            | 42; 12.6; 16.6; NR                                                                                         | Outpatient                                                  | 34                            | Captain's Log                                                               | Drill and practice                                               | Yes                        | Yes                                   | No                                    | No                             | Individual                                 | Not Evidence-Based                                                                       | 8                                     | 2                              | Passive                              | 58         |
| Benedict et al., 1994; USA <sup>5</sup>            | 38.82; 11.04; NR; 51.49                                                                                    | Outpatient                                                  | 33                            | PSSCogRehab                                                                 | Drill and practice                                               | Yes                        | Yes                                   | No                                    | No                             | Individual                                 | Not Evidence-Based                                                                       | 21                                    | 3                              | Passive                              | 46         |
| Bryce et al., 2018; Australia <sup>6</sup>         | 41.03; 13.14; 14.12; 69.86                                                                                 | Outpatient                                                  | 66                            | COGPACK                                                                     | Drill and practice                                               | Yes                        | Yes                                   | Yes                                   | No                             | Group                                      | None                                                                                     | 20                                    | 2                              | Active                               | 74         |
| Bucci et al., 2013; Italy <sup>7</sup>             | 38.22; 10.62; 17.1; 81.04                                                                                  | Outpatient                                                  | 58                            | RehaCom                                                                     | Drill and practice                                               | Yes                        | Yes                                   | Yes                                   | No                             | Individual                                 | None                                                                                     | 48                                    | 2                              | Active                               | 75         |
| Burda et al., 1994; USA <sup>8</sup>               | 46.63; 12.45; NR; NR                                                                                       | Inpatient                                                   | 69                            | Captain's Log                                                               | Drill and practice                                               | Yes                        | No                                    | No                                    | No                             | Group                                      | Not Evidence-Based                                                                       | 12                                    | 3                              | Passive                              | 46         |
| Byrne et al., 2013; China <sup>9</sup>             | 46.55; 10.81; 24.81; 100                                                                                   | Inpatient                                                   | 31                            | Author-developed program                                                    | Drill and practice                                               | Yes                        | No                                    | No                                    | No                             | Individual                                 | None                                                                                     | 12                                    | 3                              | Passive                              | 52         |
| Cavallaro et al., 2009; Italy <sup>10</sup>        | 33.62; 11.72; 8.2; NR                                                                                      | Outpatient                                                  | 86                            | COGPACK                                                                     | Drill and practice                                               | Yes                        | Yes                                   | Yes                                   | No                             | Individual                                 | Not Evidence-Based                                                                       | 36                                    | 3                              | Active                               | 45         |
| Cavallo et al., 2013; Italy <sup>11</sup>          | 42.3; 11; 17.2; 70                                                                                         | Outpatient                                                  | 10                            | Brainer                                                                     | Drill and practice                                               | Yes                        | Yes                                   | No                                    | No                             | Individual                                 | Not Evidence-Based                                                                       | 18                                    | 3                              | Active                               | 68         |
| Choi et al., 2018; Korea <sup>12</sup>             | 49.66; 11.19; 23.03; 57.9                                                                                  | Inpatient                                                   | 38                            | PSSCogRehab                                                                 | Drill and practice                                               | Yes                        | Yes                                   | No                                    | Yes                            | Individual                                 | Evidence-Based                                                                           | 20                                    | 2                              | Passive                              | 61         |
| d'Amato et al., 2011; France <sup>14</sup>         | 32.81; 12.31; 8.4; 75.34                                                                                   | Outpatient                                                  | 87                            | RehaCom                                                                     | Drill and practice                                               | Yes                        | Yes                                   | No                                    | No                             | Individual                                 | None                                                                                     | 28                                    | 2                              | Passive                              | 71         |
| Dickinson et al., 2010; USA <sup>15</sup>          | 47.61; 12.47; NR; 69.83                                                                                    | Outpatient                                                  | 63                            | Author-developed program                                                    | Drill and strategy                                               | Yes                        | Yes                                   | Yes                                   | No                             | Individual                                 | None                                                                                     | 36                                    | 3                              | Active                               | 78         |
| Donohoe et al., 2017; Ireland <sup>16</sup>        | 43.31; 13.97; NR; 60.03                                                                                    | Outpatient                                                  | 90                            | Computer-assisted WM training (McAvinue et al., 2013)                       | Drill and strategy                                               | Yes                        | Yes                                   | Yes                                   | No                             | Individual                                 | None                                                                                     | 27                                    | 5                              | Active                               | 78         |
| Drake et al., 2014; United Kingdom <sup>17</sup>   | 24.06; NR; 1; 60.62                                                                                        | Outpatient                                                  | 61                            | CIRCUITS                                                                    | Drill and strategy                                               | Yes                        | Yes                                   | No                                    | No                             | Individual                                 | Evidence-Based                                                                           | 40                                    | 5                              | Active                               | 86         |
| Fisher et al., 2014; USA <sup>18</sup>             | 21.22; 12.87; 1.63; 74.4                                                                                   | Outpatient                                                  | 86                            | PositScience                                                                | Drill and practice                                               | Yes                        | No                                    | No                                    | No                             | Individual                                 | None                                                                                     | 40                                    | 5                              | Active                               | 80         |
| Fisher et al., 2016; USA <sup>19</sup>             | 41.88; 13.28; NR; 72.41                                                                                    | Outpatient                                                  | 87                            | PositScience                                                                | Drill and practice                                               | Yes                        | No                                    | No                                    | No                             | Individual                                 | None                                                                                     | 50                                    | 5                              | Active                               | 76         |
| Fiszdon et al., 2016; USA <sup>20</sup>            | 47.81; 12.37; NR; 73.33                                                                                    | Outpatient                                                  | 75                            | PSSCogRehab                                                                 | Drill and strategy                                               | Yes                        | Yes                                   | No                                    | No                             | Individual                                 | None                                                                                     | 40                                    | 5                              | Passive                              | 59         |
| Garcia-Fernandez et al., 2019; Spain <sup>21</sup> | 25.51; 13.38; 1; 68.61                                                                                     | Outpatient                                                  | 110                           | Rehacom                                                                     | Drill and practice                                               | Yes                        | Yes                                   | No                                    | No                             | Individual                                 | Not Evidence-Based                                                                       | 24                                    | 2                              | Active                               | 68         |
| Garrido et al., 2013; Spain <sup>22</sup>          | 33.3; 9.85; 11.34; 73.16                                                                                   | Outpatient                                                  | 67                            | Combination Gexpert and Bracy Soft Tools Program CRT (Wykes & Reeder, 2005) | Drill and strategy                                               | Yes                        | Yes                                   | Yes                                   | No                             | Individual                                 | None                                                                                     | 48                                    | 2                              | Active                               | 69         |
| Gharaeipour & Scott, 2012; Iran <sup>23</sup>      | 28.72; 10.74; 1.28; 71.45                                                                                  | Inpatient                                                   | 42                            | FesKits                                                                     | Drill and strategy                                               | No                         | Yes                                   | Yes                                   | Yes                            | Group                                      | None                                                                                     | 40                                    | 5                              | Active                               | 65         |
| Gomar et al., 2015; Spain <sup>24</sup>            | 46.4; 9.42; 23.43; 65.52                                                                                   | Mixed                                                       | 87                            | FesKits                                                                     | Drill and practice                                               | Yes                        | No                                    | No                                    | No                             | Group                                      | None                                                                                     | 36                                    | 2                              | Active                               | 89         |
| Greig et al., 2007; USA <sup>25</sup>              | 40.37; 12.74; NR; 53.32                                                                                    | Outpatient                                                  | 62                            | Combination PSSCogRehab and Sci-Learn                                       | Drill and practice                                               | Yes                        | No                                    | No                                    | Yes                            | Individual                                 | Evidence-Based                                                                           | 126                                   | 4                              | Passive                              | 67         |
| Hodge et al., 2010; Australia <sup>26</sup>        | 31.33; 11; NR; 60                                                                                          | Mixed                                                       | 40                            | NEAR (Medalia & Freilich, 2008)                                             | Drill and practice                                               | Yes                        | Yes                                   | Yes                                   | No                             | Individual                                 | None                                                                                     | 30                                    | 2                              | Passive                              | 50         |
| Holzer et al., 2014; Switzerland <sup>27</sup>     | 15.53; 8.02; 2.7; 56.13                                                                                    | Outpatient                                                  | 32                            | Captain's Log                                                               | Drill and practice                                               | Yes                        | Yes                                   | No                                    | No                             | Individual                                 | Not Evidence-Based                                                                       | 12                                    | 2                              | Active                               | 75         |
| Horan et al., 2011; USA <sup>28</sup>              | 45.9; 13.02; NR; 84.55                                                                                     | Outpatient                                                  | 45                            | PositScience                                                                | Drill and practice                                               | Yes                        | No                                    | No                                    | No                             | Group                                      | None                                                                                     | 24                                    | 2                              | Active                               | 68         |
| Iwata et al., 2017; Japan <sup>29</sup>            | 34.36; NR; 11.9; 24.99                                                                                     | Outpatient                                                  | 60                            | COGPACK                                                                     | Drill and practice                                               | Yes                        | Yes                                   | Yes                                   | Yes                            | Group                                      | Evidence-Based                                                                           | 24                                    | 2                              | Passive                              | 77         |
| Jahshan et al., 2019; USA <sup>30</sup>            | 51.42; 12.78; 31.53; 77.93                                                                                 | Outpatient                                                  | 59                            | PositScience                                                                | Drill and practice                                               | Yes                        | No                                    | No                                    | No                             | Group                                      | None                                                                                     | 36                                    | 3                              | Active                               | 76         |
| Katsumi et al., 2019; Japan <sup>31</sup>          | 37.75; 11.95; 13.9; 59.1                                                                                   | Outpatient                                                  | 44                            | NEAR (Medalia & Freilich, 2008)                                             | Drill and practice                                               | Yes                        | Yes                                   | No                                    | Yes                            | Group                                      | Not Evidence-Based                                                                       | 15                                    | 3                              | Passive                              | 49         |
| Keefe et al., 2012; USA <sup>32</sup>              | 37; 13.49; NR; 73.6                                                                                        | Outpatient                                                  | 53                            | PositScience                                                                | Drill and practice                                               | Yes                        | Yes                                   | No                                    | Yes                            | Individual                                 | None                                                                                     | 40                                    | 4                              | Active                               | 80         |
| Kidd et al., 2014; Canada <sup>33</sup>            | 34.19; 12.53; 6.85; 45.89                                                                                  | Outpatient                                                  | 37                            | COGPACK                                                                     | Drill and practice                                               | Yes                        | Yes                                   | No                                    | Yes                            | Group                                      | Not Evidence-Based                                                                       | 20                                    | 2                              | Active                               | 59         |
| Kukla et al., 2018; USA <sup>34</sup>              | 48.48; 12.9; NR; 92                                                                                        | Outpatient                                                  | 50                            | PositScience                                                                | Drill and practice                                               | Yes                        | No                                    | No                                    | No                             | Group                                      | Evidence-Based                                                                           | 50                                    | 2                              | Active                               | 68         |
| Kurtz et al., 2007; USA <sup>35</sup>              | 34.98; 13.15; 10.46; 66.33                                                                                 | Outpatient                                                  | 42                            | PSSCogRehab                                                                 | Drill and practice                                               | Yes                        | Yes                                   | No                                    | No                             | Group                                      | Not Evidence-Based                                                                       | 100                                   | 3                              | Active                               | 60         |
| Kurtz et al., 2015; USA <sup>36</sup>              | 36.64; 12.07; 12.59; 73                                                                                    | Outpatient                                                  | 64                            | PSSCogRehab                                                                 | Drill and practice                                               | Yes                        | Yes                                   | No                                    | No                             | Group                                      | Evidence-Based                                                                           | 50                                    | NR                             | Active                               | 63         |
| Lee, 2013; Korea <sup>37</sup>                     | 43.5; 12.78; 17.64; 54.99                                                                                  | Inpatient                                                   | 60                            | Cog-trainer                                                                 | Drill and strategy                                               | Yes                        | Yes                                   | No                                    | No                             | Group                                      | Not Evidence-Based                                                                       | 20                                    | 2                              | Passive                              | 55         |
| Lindenmayer et al., 2008; USA <sup>38</sup>        | 43.46; 10.63; NR; 89.59                                                                                    | Inpatient                                                   | 85                            | COGPACK                                                                     | Drill and practice                                               | Yes                        | Yes                                   | No                                    | Yes                            | Group                                      | Evidence-Based                                                                           | 24                                    | 2                              | Active                               | 70         |

| Study Citation; Country                                    | Sample Characteristics: Mean age (years); Mean education (years); Mean duration of illness (years); % male | Clinical Status of Sample (Inpatient, Outpatient, or Mixed) | Total Participant Sample Size | CR Program Name                                          | Remediation Approach (drill and practice vs. drill and strategy) | Computer Exposure (Yes/No) | Therapist Exposure During CR (yes/no) | Adjunctive Strategy Coaching (Yes/No) | Weekly bridging group (Yes/No) | Size of CR Sessions (Group vs. Individual) | Nature of Adjunctive Psychiatric Rehabilitation (None/Not Evidence-Based/ Evidence-Based) | Aim for Duration of Treatment (Hours) | Number of CR Sessions per Week | Type of Control (Active vs. Passive) | CTAM Score |
|------------------------------------------------------------|------------------------------------------------------------------------------------------------------------|-------------------------------------------------------------|-------------------------------|----------------------------------------------------------|------------------------------------------------------------------|----------------------------|---------------------------------------|---------------------------------------|--------------------------------|--------------------------------------------|-------------------------------------------------------------------------------------------|---------------------------------------|--------------------------------|--------------------------------------|------------|
| López-Luengo & Vázquez et al., 2003; Spain <sup>49</sup>   | 33.55; NR; 13.21; 83.29                                                                                    | Outpatient                                                  | 24                            | Auditory Processing Training (APT)                       | Drill and practice                                               | No                         | Yes                                   | Yes                                   | No                             | Individual                                 | None                                                                                      | 37.5                                  | 2                              | Passive                              | 49         |
| Lu et al., 2012; China <sup>40</sup>                       | 37.5; 10.5; 23.5; 61.1                                                                                     | Inpatient                                                   | 126                           | CRT (Delahunty & Morice 1993)                            | Drill and strategy                                               | No                         | Yes                                   | Yes                                   | No                             | Group                                      | Not Evidence-Based                                                                        | 45                                    | 5                              | Active                               | 45         |
| Mak et al., 2013; Poland <sup>41</sup>                     | 36.47; NR; 9.99; 45.66                                                                                     | Outpatient                                                  | 81                            | RehaCom                                                  | Drill and practice                                               | Yes                        | No                                    | No                                    | No                             | Individual                                 | None                                                                                      | 10.67                                 | 2                              | Passive                              | 41         |
| McGurk et al., 2005 & 2007; USA <sup>42</sup>              | 35.6; 11.3; 12.88; 54.5                                                                                    | Outpatient                                                  | 44                            | COGPACK                                                  | Drill and practice                                               | Yes                        | Yes                                   | Yes                                   | No                             | Individual                                 | Evidence-Based                                                                            | 24                                    | 2                              | Active                               | 65         |
| McGurk et al., 2016; USA <sup>43</sup>                     | 37.69; NR; NR; 70.38                                                                                       | Outpatient                                                  | 54                            | COGPACK                                                  | Drill and practice                                               | Yes                        | Yes                                   | Yes                                   | No                             | Individual                                 | Evidence-Based                                                                            | 24                                    | 2                              | Active                               | 73         |
| Medalia et al., 1998; USA <sup>44</sup>                    | 32.5; 10.8; NR; 77.5                                                                                       | Inpatient                                                   | 54                            | ORM (Ben-Yishay et al. 1987)                             | Drill and practice                                               | Yes                        | Yes                                   | No                                    | No                             | Individual                                 | None                                                                                      | 6                                     | 3                              | Active                               | 63         |
| Medalia et al., 2000; USA <sup>45</sup>                    | 36.3; 10.5; NR; 55.56                                                                                      | Inpatient                                                   | 36                            | Author-developed program                                 | Drill and practice                                               | Yes                        | Yes                                   | Yes                                   | No                             | Individual                                 | None                                                                                      | 5                                     | 2                              | Passive                              | 79         |
| Mendella et al., 2015; Canada <sup>46</sup>                | 24.92; 13.22; 1; 74.1                                                                                      | Outpatient                                                  | 27                            | Compensatory Cognitive Training (CCT)                    | Drill and strategy                                               | No                         | Yes                                   | No                                    | No                             | Group                                      | Evidence-Based                                                                            | 24                                    | 1                              | Passive                              | 57         |
| Moritz et al., 2013; Germany <sup>47</sup>                 | 34.78; 11.46; NR; 62.65                                                                                    | Mixed                                                       | 150                           | COGPACK                                                  | Drill and practice                                               | Yes                        | No                                    | No                                    | No                             | Group                                      | Not Evidence-Based                                                                        | 16                                    | NR                             | Active                               | 79         |
| Moritz et al., 2015; Germany <sup>48</sup>                 | 38.57; NR; NR; 35                                                                                          | Mixed                                                       | 60                            | Mybraintraining                                          | Drill and practice                                               | Yes                        | No                                    | No                                    | No                             | Individual                                 | None                                                                                      | NR                                    | 2                              | Passive                              | 54         |
| O'Reilly et al. 2019; Ireland <sup>49</sup>                | 40.96; NR; NR; 84.61                                                                                       | Inpatient                                                   | 65                            | Author-developed program                                 | Drill and strategy                                               | Yes                        | Yes                                   | No                                    | Yes                            | Individual                                 | Not Evidence-Based                                                                        | 42                                    | 3                              | Passive                              | 87         |
| Omiya et al., 2016; Japan <sup>50</sup>                    | 41; 13.35; 13.18; 41.15                                                                                    | Mixed                                                       | 17                            | Frontal-Executive Program CRT (Delahunty & Morris, 1993) | Drill and strategy                                               | No                         | Yes                                   | Yes                                   | No                             | Individual                                 | Not Evidence-Based                                                                        | 44                                    | 2                              | Passive                              | 46         |
| Ostergaard Christensen et al., 2014; Denmark <sup>51</sup> | 24.95; NR; 1; 53.82                                                                                        | Outpatient                                                  | 117                           | NEUROCOM                                                 | Drill and strategy                                               | Yes                        | Yes                                   | Yes                                   | Yes                            | Individual                                 | Evidence-Based                                                                            | 32                                    | 2                              | Active                               | 75         |
| Penadés et al., 2006; Spain <sup>52</sup>                  | 35.14; 10.15; 13.8; 57.5                                                                                   | Outpatient                                                  | 40                            | Frontal-Executive Program CRT (Delahunty & Morice, 1993) | Drill and strategy                                               | No                         | Yes                                   | No                                    | No                             | Individual                                 | None                                                                                      | 40                                    | 3                              | Active                               | 65         |
| Penadés et al., 2013; Spain <sup>53</sup>                  | 36.97; 11.77; 12.93; 77.08                                                                                 | Outpatient                                                  | 35                            | Frontal-Executive Program CRT (Delahunty & Morice, 1993) | Drill and strategy                                               | No                         | Yes                                   | No                                    | No                             | Individual                                 | None                                                                                      | 40                                    | 3                              | Active                               | 71         |
| Penadés et al., 2018; Spain <sup>54</sup>                  | 40.07; NR; 15.89; 68.55                                                                                    | Outpatient                                                  | 70                            | Frontal-Executive Program CRT (Delahunty & Morice, 1993) | Drill and strategy                                               | No                         | Yes                                   | No                                    | No                             | Individual                                 | None                                                                                      | 40                                    | 2.5                            | Active                               | 61         |
| Pontes et al., 2013; Brazil <sup>55</sup>                  | 38.14; 10.33; 15.15; 82.41                                                                                 | Outpatient                                                  | 17                            | Author-developed program                                 | Drill and strategy                                               | No                         | Yes                                   | Yes                                   | No                             | Group                                      | None                                                                                      | 20                                    | 1                              | Active                               | 74         |
| Popova et al., 2014; Germany <sup>56</sup>                 | 35.95; 11.05; NR; 71.05                                                                                    | Inpatient                                                   | 38                            | PositScience                                             | Drill and practice                                               | Yes                        | No                                    | No                                    | No                             | Individual                                 | None                                                                                      | 20                                    | 5                              | Passive                              | 45         |
| Puig et al., 2014; Spain <sup>57</sup>                     | 16.75; 8.25; 1.4; 52                                                                                       | Outpatient                                                  | 50                            | CRT (Wykes & Reeder, 2005)                               | Drill and strategy                                               | No                         | Yes                                   | No                                    | No                             | Individual                                 | None                                                                                      | 40                                    | 2                              | Passive                              | 68         |
| Ramsay et al., 2017; USA <sup>58</sup>                     | 44.18; 13; 19.85; NR                                                                                       | Outpatient                                                  | 27                            | PSSCogRehab                                              | Drill and practice                                               | Yes                        | Yes                                   | No                                    | Yes                            | Group                                      | None                                                                                      | 48                                    | 3                              | Active                               | 71         |
| Rass et al., 2012; USA <sup>59</sup>                       | 41.3; NR; 20.25; 61.75                                                                                     | Outpatient                                                  | 34                            | Auditory Processing Training (APT)                       | Drill and practice                                               | Yes                        | No                                    | No                                    | No                             | Individual                                 | None                                                                                      | 40                                    | 2                              | Active                               | 65         |
| Reeder et al., 2017; United Kingdom <sup>60</sup>          | 38.3; 13.25; NR; 64.55                                                                                     | Mixed                                                       | 93                            | CIRCUITS                                                 | Drill and strategy                                               | Yes                        | Yes                                   | No                                    | No                             | Individual                                 | None                                                                                      | 40                                    | 3                              | Passive                              | 77         |
| Royer et al., 2012; France <sup>62</sup>                   | 32.76; 11.41; 11.07; NR                                                                                    | Outpatient                                                  | 46                            | RehaCom                                                  | Drill and strategy                                               | Yes                        | Yes                                   | Yes                                   | No                             | Group                                      | None                                                                                      | 144                                   | 3                              | Passive                              | 32         |
| Sartory et al., 2005; Germany <sup>63</sup>                | 31.9; 10.3; 6.15; 66.7                                                                                     | Inpatient                                                   | 42                            | COGPACK                                                  | Drill and practice                                               | Yes                        | No                                    | No                                    | No                             | Group                                      | None                                                                                      | 11.25                                 | 5                              | Passive                              | 58         |
| Silverstein et al., 2005; USA <sup>64</sup>                | 39.29; 10.5; NR; 87.07                                                                                     | Inpatient                                                   | 31                            | Attention Processing Training (APT)                      | Drill and practice                                               | No                         | Yes                                   | No                                    | No                             | Individual                                 | Evidence-Based                                                                            | NR                                    | NR                             | Passive                              | 45         |
| Silverstein et al., 2014; USA <sup>65</sup>                | 43.99; 11.97; NR; 74.07                                                                                    | Outpatient                                                  | 81                            | Attention Shaping (AS)                                   | Drill and practice                                               | No                         | Yes                                   | No                                    | No                             | Group                                      | Evidence-Based                                                                            | 45                                    | 2                              | Active                               | 62         |

| Study Citation; Country                          | Sample Characteristics:<br>Mean age (years); Mean education (years); Mean duration of illness (years); % male | Clinical Status of Sample (Inpatient, Outpatient, or Mixed) | Total Participant Sample Size | CR Program Name                                          | Remediation Approach (drill and practice vs. drill and strategy) | Computer Exposure (Yes/No) | Therapist Exposure During CR (yes/no) | Adjunctive Strategy Coaching (Yes/No) | Weekly bridging group (Yes/No) | Size of CR Sessions (Group vs. Individual) | Nature of Adjunctive Psychiatric Rehabilitation (None/Not Evidence-Based/ Evidence-Based) | Aim for Duration of Treatment (Hours) | Number of CR Sessions per Week | Type of Control (Active vs. Passive) | CTAM Score |
|--------------------------------------------------|---------------------------------------------------------------------------------------------------------------|-------------------------------------------------------------|-------------------------------|----------------------------------------------------------|------------------------------------------------------------------|----------------------------|---------------------------------------|---------------------------------------|--------------------------------|--------------------------------------------|-------------------------------------------------------------------------------------------|---------------------------------------|--------------------------------|--------------------------------------|------------|
| Tan & King, 2013; Australia <sup>66</sup>        | 34.69; 11.14; 10.58; 57.13                                                                                    | Outpatient                                                  | 70                            | PSSCogRehab                                              | Drill and strategy                                               | Yes                        | Yes                                   | Yes                                   | Yes                            | Group                                      | Evidence-Based                                                                            | 48                                    | 2                              | Active                               | 83         |
| Tan et al., 2016; China <sup>67</sup>            | 46.43; 9.92; 22.73; 60                                                                                        | Inpatient                                                   | 104                           | Frontal-Executive Program CRT (Delahunty & Morice, 1993) | Drill and strategy                                               | No                         | Yes                                   | Yes                                   | No                             | Group                                      | None                                                                                      | 40                                    | 5                              | Active                               | 76         |
| Tan et al., 2019; China <sup>68</sup>            | 45.1; 11.78; 20.43; 61.39                                                                                     | Inpatient                                                   | 311                           | CRT (Wykes & Reeder, 2005)                               | Drill and strategy                                               | Yes                        | No                                    | No                                    | No                             | Group                                      | None                                                                                      | 37.5                                  | 4                              | Active                               | 70         |
| Thomas et al., 2018; USA <sup>69</sup>           | 35.11; 11.82; 15.69; 47.78                                                                                    | Inpatient                                                   | 46                            | PositScience                                             | Drill and practice                                               | Yes                        | No                                    | No                                    | No                             | Group                                      | Not Evidence-Based                                                                        | 40                                    | 5                              | Passive                              | 45         |
| Twamley et al., 2012; USA <sup>70</sup>          | 46.32; 12.94; 23.26; 65.22                                                                                    | Outpatient                                                  | 69                            | Compensatory Cognitive Training (CCT)                    | Drill and strategy                                               | No                         | Yes                                   | Yes                                   | No                             | Group                                      | None                                                                                      | 24                                    | 1                              | Passive                              | 73         |
| Vauth et al., 2005; Switzerland <sup>71</sup>    | 28.5; 12.75; 5.56; 66.3                                                                                       | Inpatient                                                   | 93                            | Author-developed program                                 | Drill and strategy                                               | Yes                        | Yes                                   | Yes                                   | No                             | Group                                      | Evidence-Based                                                                            | 24                                    | 2                              | Active                               | 80         |
| Wölwer et al., 2005; Germany <sup>72</sup>       | 35.93; NR; NR; 71.43                                                                                          | Inpatient                                                   | 49                            | COGPACK                                                  | Drill and practice                                               | Yes                        | Yes                                   | No                                    | No                             | Group                                      | None                                                                                      | 9                                     | 2                              | Passive                              | 78         |
| Wykes et al., 1999; United Kingdom <sup>73</sup> | 38.49; 12.34; NR; 75.77                                                                                       | Mixed                                                       | 33                            | CRT (Delahunty & Morice, 1993)                           | Drill and strategy                                               | No                         | Yes                                   | Yes                                   | No                             | Individual                                 | Not Evidence-Based                                                                        | 40                                    | 3                              | Active                               | 61         |
| Wykes et al., 2007; United Kingdom <sup>74</sup> | 18.18; NR; 1.09; 64.85                                                                                        | Mixed                                                       | 40                            | CRT (Delahunty & Morice, 1993)                           | Drill and strategy                                               | No                         | Yes                                   | Yes                                   | No                             | Individual                                 | None                                                                                      | 40                                    | 5                              | Passive                              | 76         |
| Wykes et al., 2007; United Kingdom <sup>75</sup> | 36; NR; NR; 73                                                                                                | Outpatient                                                  | 85                            | CRT (Delahunty & Morice, 1993)                           | Drill and strategy                                               | No                         | Yes                                   | Yes                                   | No                             | Individual                                 | None                                                                                      | 40                                    | 3                              | Passive                              | 90         |

# Global Cognition Effects

Study name

Statistics for each study

Hedges's g and 95% CI

|                                    | Hedges's<br>g | Standard<br>error | Variance | Lower<br>limit | Upper<br>limit | Z-Value | p-Value |
|------------------------------------|---------------|-------------------|----------|----------------|----------------|---------|---------|
| Ahmed et al. 2015                  | 0.618         | 0.230             | 0.053    | 0.167          | 1.070          | 2.686   | 0.007   |
| Bryce et al. 2018                  | 0.671         | 0.308             | 0.095    | 0.067          | 1.275          | 2.177   | 0.029   |
| Fisher et al. 2014                 | 0.464         | 0.217             | 0.047    | 0.040          | 0.889          | 2.142   | 0.032   |
| Fisher et al. 2016                 | 0.065         | 0.213             | 0.045    | -0.352         | 0.482          | 0.306   | 0.760   |
| Garcia-Fernandez et al. 2019       | -0.259        | 0.218             | 0.047    | -0.685         | 0.168          | -1.188  | 0.235   |
| Gharaeipour et al. 2012            | 0.020         | 0.303             | 0.092    | -0.574         | 0.613          | 0.066   | 0.948   |
| Holzer et al. 2014                 | -0.717        | 0.359             | 0.129    | -1.420         | -0.014         | -1.998  | 0.046   |
| Horan et al. 2011                  | 0.110         | 0.318             | 0.101    | -0.513         | 0.733          | 0.345   | 0.730   |
| Iwata et al. 2017                  | 0.800         | 0.265             | 0.070    | 0.280          | 1.320          | 3.016   | 0.003   |
| Jahshan et al. 2019                | 0.010         | 0.290             | 0.084    | -0.559         | 0.579          | 0.033   | 0.974   |
| Katsumi et al. 2019                | 1.799         | 0.353             | 0.124    | 1.108          | 2.491          | 5.100   | 0.000   |
| Keefe et al. 2012                  | 0.431         | 0.291             | 0.085    | -0.139         | 1.001          | 1.483   | 0.138   |
| Kukla et al. 2018                  | 0.295         | 0.302             | 0.091    | -0.296         | 0.887          | 0.979   | 0.328   |
| Lindenmayer et al. 2008            | 0.452         | 0.231             | 0.053    | -0.002         | 0.905          | 1.953   | 0.051   |
| McGurk et al. 2005                 | 0.438         | 0.300             | 0.090    | -0.150         | 1.026          | 1.461   | 0.144   |
| Mendella et al. 2015               | 0.639         | 0.390             | 0.152    | -0.125         | 1.402          | 1.639   | 0.101   |
| O'Reilly et al. 2019               | 0.337         | 0.247             | 0.061    | -0.147         | 0.821          | 1.366   | 0.172   |
| Omiya et al. 2016                  | 1.221         | 0.506             | 0.257    | 0.228          | 2.213          | 2.410   | 0.016   |
| Ostergaard Christensen et al. 2014 | 0.336         | 0.202             | 0.041    | -0.060         | 0.732          | 1.662   | 0.097   |
| Penadés et al. 2018                | 0.643         | 0.252             | 0.063    | 0.150          | 1.136          | 2.555   | 0.011   |
| Popova et al. 2014                 | -0.072        | 0.318             | 0.101    | -0.695         | 0.551          | -0.227  | 0.821   |
| Puig et al. 2014                   | 0.064         | 0.355             | 0.126    | -0.632         | 0.761          | 0.181   | 0.856   |
| Rass et al. 2012                   | -0.395        | 0.338             | 0.114    | -1.058         | 0.268          | -1.168  | 0.243   |
| Silverstein et al. 2014            | -0.249        | 0.221             | 0.049    | -0.683         | 0.185          | -1.125  | 0.261   |
| Tan et al. 2019                    | 0.171         | 0.127             | 0.016    | -0.078         | 0.420          | 1.344   | 0.179   |
| Thomas et al. 2018                 | 0.134         | 0.325             | 0.106    | -0.503         | 0.771          | 0.411   | 0.681   |
|                                    | 0.263         | 0.050             | 0.003    | 0.165          | 0.362          | 5.230   | 0.000   |

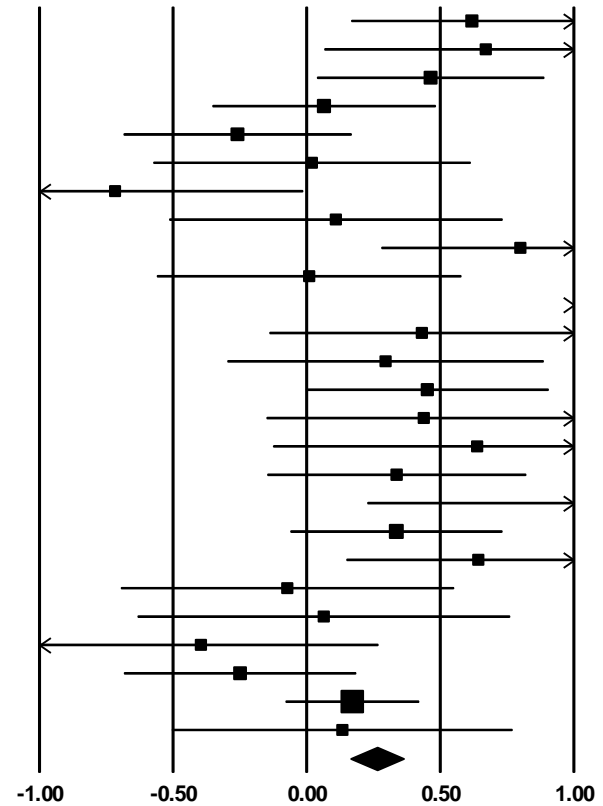

# Attention Effects

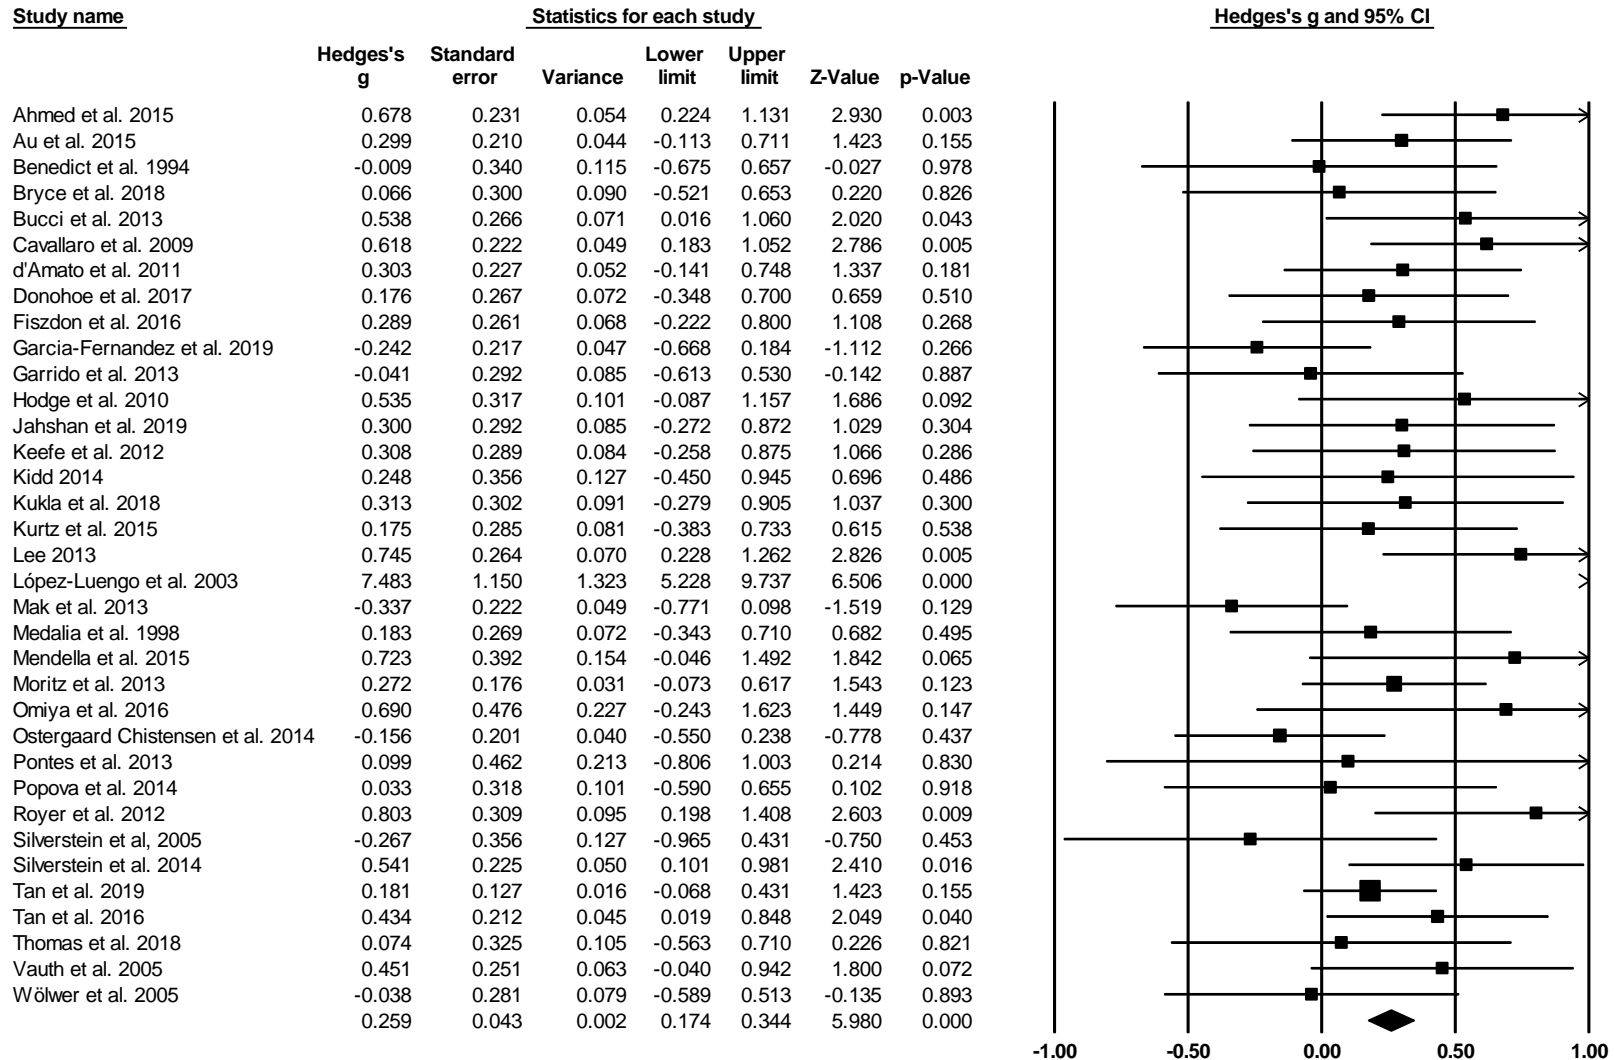



# Processing Speed Effects

## Study name

## Statistics for each study

## Hedges's g and 95% CI

|                                    | Hedges's g | Standard error | Variance | Lower limit | Upper limit | Z-Value | p-Value |
|------------------------------------|------------|----------------|----------|-------------|-------------|---------|---------|
| Ahmed et al. 2015                  | 0.414      | 0.227          | 0.052    | -0.032      | 0.859       | 1.820   | 0.069   |
| Au et al. 2015                     | -0.260     | 0.210          | 0.044    | -0.672      | 0.151       | -1.240  | 0.215   |
| Balzan et al. 2019                 | -0.028     | 0.268          | 0.072    | -0.554      | 0.497       | -0.106  | 0.916   |
| Bellucci et al. 2002               | 0.320      | 0.337          | 0.114    | -0.341      | 0.981       | 0.950   | 0.342   |
| Bryce et al. 2018                  | 0.012      | 0.299          | 0.090    | -0.575      | 0.599       | 0.041   | 0.968   |
| Bucci et al. 2013                  | 0.109      | 0.262          | 0.069    | -0.404      | 0.622       | 0.416   | 0.678   |
| Burda et al. 1994                  | 0.588      | 0.246          | 0.061    | 0.105       | 1.071       | 2.388   | 0.017   |
| Cavallaro et al. 2009              | 0.182      | 0.217          | 0.047    | -0.244      | 0.607       | 0.838   | 0.402   |
| Cavallo et al. 2013                | 2.988      | 0.879          | 0.773    | 1.265       | 4.710       | 3.399   | 0.001   |
| Choi et al. 2018                   | 0.222      | 0.323          | 0.104    | -0.411      | 0.855       | 0.688   | 0.491   |
| Dickinson et al. 2010              | 0.099      | 0.255          | 0.065    | -0.400      | 0.598       | 0.388   | 0.698   |
| Donohoe et al. 2017                | 0.111      | 0.267          | 0.071    | -0.413      | 0.634       | 0.414   | 0.679   |
| Fisher et al. 2014                 | 0.287      | 0.215          | 0.046    | -0.134      | 0.708       | 1.335   | 0.182   |
| Fisher et al. 2016                 | 0.185      | 0.213          | 0.046    | -0.234      | 0.603       | 0.865   | 0.387   |
| Fiszdon et al. 2016                | 0.748      | 0.268          | 0.072    | 0.223       | 1.274       | 2.790   | 0.005   |
| Garcia-Fernandez et al. 2019       | -0.396     | 0.219          | 0.048    | -0.825      | 0.033       | -1.811  | 0.070   |
| Garrido et al. 2013                | 0.408      | 0.294          | 0.087    | -0.169      | 0.986       | 1.387   | 0.165   |
| Gharaeipour et al. 2012            | 0.622      | 0.310          | 0.096    | 0.014       | 1.231       | 2.006   | 0.045   |
| Gomar et al. 2015                  | 0.248      | 0.237          | 0.056    | -0.216      | 0.712       | 1.047   | 0.295   |
| Hodge et al. 2010                  | 0.674      | 0.321          | 0.103    | 0.046       | 1.303       | 2.104   | 0.035   |
| Iwata et al. 2017                  | 0.472      | 0.259          | 0.067    | -0.034      | 0.979       | 1.827   | 0.068   |
| Jahshan et al. 2017                | 0.123      | 0.291          | 0.084    | -0.447      | 0.692       | 0.422   | 0.673   |
| Katsumi et al. 2019                | 0.839      | 0.309          | 0.096    | 0.233       | 1.445       | 2.713   | 0.007   |
| Keefe et al. 2012                  | 0.133      | 0.288          | 0.083    | -0.431      | 0.697       | 0.461   | 0.645   |
| Kidd et al. 2014                   | -0.491     | 0.360          | 0.130    | -1.196      | 0.215       | -1.363  | 0.173   |
| Kukla et al. 2018                  | -0.142     | 0.301          | 0.090    | -0.731      | 0.447       | -0.474  | 0.636   |
| Kurtz et al. 2007                  | -0.120     | 0.304          | 0.093    | -0.717      | 0.476       | -0.395  | 0.693   |
| Lindenmayer et al. 2008            | 0.517      | 0.237          | 0.056    | 0.052       | 0.982       | 2.178   | 0.029   |
| López-Luengo et al. 2003           | 0.194      | 0.397          | 0.157    | -0.583      | 0.971       | 0.489   | 0.625   |
| Mak et al. 2013                    | 0.165      | 0.221          | 0.049    | -0.267      | 0.597       | 0.748   | 0.455   |
| McGurk et al. 2005                 | 0.178      | 0.297          | 0.088    | -0.405      | 0.760       | 0.598   | 0.550   |
| McGurk et al. 2016                 | 0.175      | 0.278          | 0.077    | -0.369      | 0.720       | 0.632   | 0.528   |
| Mendella et al. 2015               | 0.814      | 0.396          | 0.157    | 0.038       | 1.589       | 2.057   | 0.040   |
| Moritz et al. 2013                 | 0.370      | 0.177          | 0.031    | 0.023       | 0.716       | 2.093   | 0.036   |
| Omiya et al. 2016                  | 0.880      | 0.485          | 0.235    | -0.071      | 1.831       | 1.813   | 0.070   |
| O'Reilly et al. 2019               | 0.154      | 0.246          | 0.060    | -0.327      | 0.636       | 0.629   | 0.529   |
| Ostergaard Christensen et al. 2014 | 0.311      | 0.202          | 0.041    | -0.085      | 0.707       | 1.541   | 0.123   |
| Penadés et al. 2013                | 0.183      | 0.331          | 0.110    | -0.466      | 0.832       | 0.553   | 0.580   |
| Penadés et al. 2018                | 0.020      | 0.245          | 0.060    | -0.460      | 0.501       | 0.082   | 0.935   |
| Pontes et al. 2013                 | -0.123     | 0.462          | 0.213    | -1.028      | 0.782       | -0.267  | 0.789   |
| Popova et al. 2014                 | -0.303     | 0.320          | 0.102    | -0.930      | 0.323       | -0.949  | 0.343   |
| Puig et al. 2014                   | -0.115     | 0.356          | 0.126    | -0.812      | 0.582       | -0.323  | 0.747   |
| Rass et al. 2012                   | -0.090     | 0.335          | 0.112    | -0.747      | 0.567       | -0.269  | 0.788   |
| Royer et al. 2012                  | 0.276      | 0.298          | 0.089    | -0.309      | 0.861       | 0.926   | 0.355   |
| Sartory et al. 2005                | 0.549      | 0.309          | 0.095    | -0.056      | 1.154       | 1.780   | 0.075   |
| Tan et al. 2013                    | 0.455      | 0.282          | 0.080    | -0.098      | 1.009       | 1.612   | 0.107   |
| Tan et al. 2016                    | 0.526      | 0.213          | 0.045    | 0.109       | 0.943       | 2.471   | 0.013   |
| Tan et al. 2019                    | 0.110      | 0.127          | 0.016    | -0.139      | 0.360       | 0.868   | 0.385   |
| Thomas et al. 2018                 | 0.103      | 0.325          | 0.106    | -0.534      | 0.739       | 0.316   | 0.752   |
| Twanley et al. 2012                | -0.019     | 0.297          | 0.088    | -0.602      | 0.564       | -0.065  | 0.949   |
| Wölwer et al. 2005                 | -0.381     | 0.284          | 0.081    | -0.937      | 0.175       | -1.342  | 0.179   |
| Wykes et al. 1999                  | -0.245     | 0.357          | 0.127    | -0.944      | 0.454       | -0.687  | 0.492   |
|                                    | 0.200      | 0.037          | 0.001    | 0.128       | 0.271       | 5.446   | 0.000   |

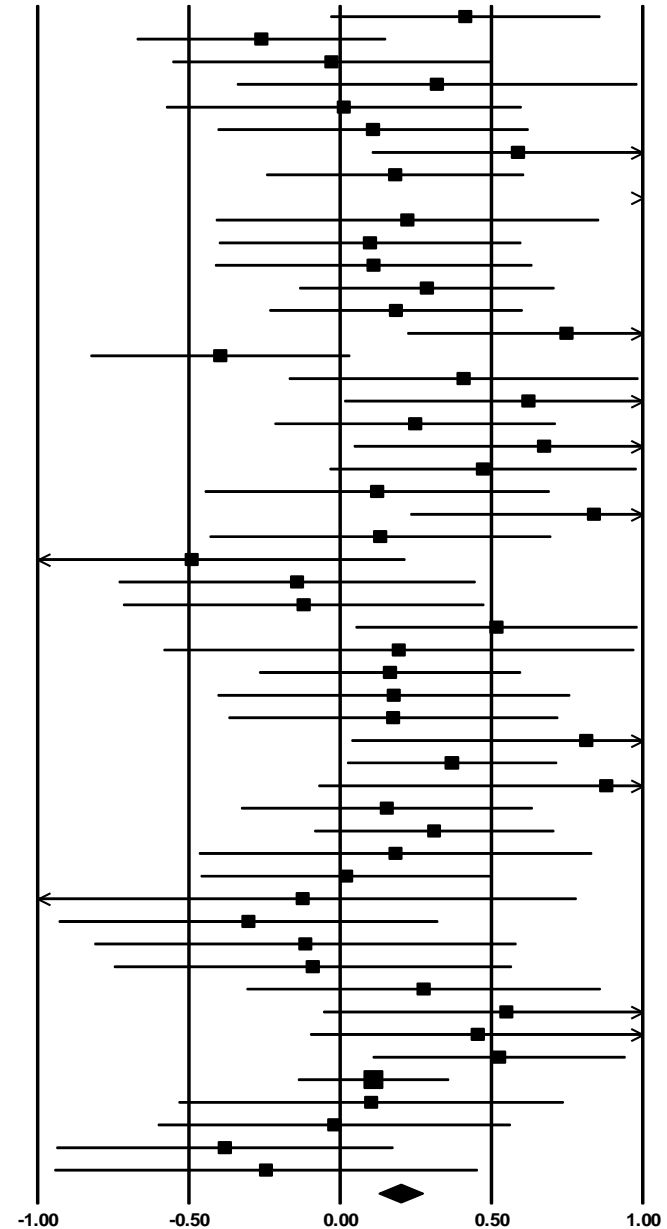

# Reasoning Effects

| Study name                         | Statistics for each study |                |          |             |             |         | Hedges's g and 95% CI |  |
|------------------------------------|---------------------------|----------------|----------|-------------|-------------|---------|-----------------------|--|
|                                    | Hedges's g                | Standard error | Variance | Lower limit | Upper limit | Z-Value | p-Value               |  |
| Ahmed et al. 2015                  | 0.594                     | 0.230          | 0.053    | 0.143       | 1.044       | 2.582   | 0.010                 |  |
| Au et al. 2015                     | -0.025                    | 0.209          | 0.044    | -0.435      | 0.385       | -0.119  | 0.905                 |  |
| Balzan et al. 2019                 | 0.612                     | 0.275          | 0.075    | 0.074       | 1.150       | 2.229   | 0.026                 |  |
| Bryce et al. 2018                  | -0.094                    | 0.300          | 0.090    | -0.681      | 0.493       | -0.313  | 0.754                 |  |
| Bucci et al. 2013                  | 0.068                     | 0.262          | 0.068    | -0.444      | 0.581       | 0.261   | 0.794                 |  |
| Cavallaro et al. 2009              | 0.526                     | 0.220          | 0.049    | 0.094       | 0.958       | 2.388   | 0.017                 |  |
| Cavallo et al. 2013                | 0.571                     | 0.585          | 0.343    | -0.576      | 1.718       | 0.975   | 0.329                 |  |
| Choi et al. 2018                   | 0.229                     | 0.323          | 0.104    | -0.404      | 0.862       | 0.710   | 0.478                 |  |
| d'Amato et al. 2011                | -0.258                    | 0.227          | 0.051    | -0.702      | 0.186       | -1.138  | 0.255                 |  |
| Dickinson et al. 2010              | 0.033                     | 0.255          | 0.065    | -0.465      | 0.532       | 0.131   | 0.896                 |  |
| Donohoe et al. 2017                | -0.286                    | 0.268          | 0.072    | -0.812      | 0.240       | -1.067  | 0.286                 |  |
| Fisher et al. 2014                 | 0.436                     | 0.216          | 0.047    | 0.012       | 0.860       | 2.014   | 0.044                 |  |
| Fisher et al. 2016                 | -0.103                    | 0.213          | 0.045    | -0.521      | 0.314       | -0.484  | 0.628                 |  |
| Flszdon et al. 2016                | 0.955                     | 0.273          | 0.075    | 0.420       | 1.491       | 3.494   | 0.000                 |  |
| Garcia-Fernandez et al. 2019       | -0.280                    | 0.218          | 0.047    | -0.707      | 0.146       | -1.288  | 0.198                 |  |
| Garrido et al. 2013                | 0.683                     | 0.300          | 0.090    | 0.095       | 1.270       | 2.278   | 0.023                 |  |
| Gharaeipour et al. 2012            | 0.213                     | 0.304          | 0.092    | -0.382      | 0.808       | 0.702   | 0.483                 |  |
| Gomar et al. 2015                  | -0.196                    | 0.236          | 0.056    | -0.659      | 0.268       | -0.827  | 0.408                 |  |
| Greig et al. 2007                  | -0.280                    | 0.253          | 0.064    | -0.775      | 0.215       | -1.110  | 0.267                 |  |
| Hodge et al. 2010                  | 1.092                     | 0.335          | 0.112    | 0.436       | 1.747       | 3.263   | 0.001                 |  |
| Iwata et al. 2017                  | 0.448                     | 0.258          | 0.067    | -0.058      | 0.954       | 1.734   | 0.083                 |  |
| Jahshan et al. 2019                | 0.007                     | 0.290          | 0.084    | -0.562      | 0.576       | 0.024   | 0.981                 |  |
| Katsumi et al. 2019                | 1.672                     | 0.346          | 0.119    | 0.994       | 2.349       | 4.837   | 0.000                 |  |
| Keefe et al. 2012                  | 0.500                     | 0.292          | 0.085    | -0.072      | 1.072       | 1.712   | 0.087                 |  |
| Kidd et al. 2014                   | -0.332                    | 0.357          | 0.127    | -1.032      | 0.367       | -0.931  | 0.352                 |  |
| Kukla et al. 2018                  | 0.197                     | 0.301          | 0.091    | -0.393      | 0.787       | 0.655   | 0.512                 |  |
| Kurtz et al. 2015                  | -0.097                    | 0.279          | 0.078    | -0.643      | 0.450       | -0.347  | 0.728                 |  |
| Kurtz et al. 2007                  | 0.000                     | 0.304          | 0.093    | -0.596      | 0.596       | 0.000   | 1.000                 |  |
| Lindemeyer et al. 2008             | 0.292                     | 0.228          | 0.052    | -0.155      | 0.738       | 1.281   | 0.200                 |  |
| López-Luengo et al. 2003           | 0.284                     | 0.398          | 0.158    | -0.495      | 1.064       | 0.715   | 0.475                 |  |
| Lu et al. 2012                     | 0.687                     | 0.185          | 0.034    | 0.324       | 1.050       | 3.709   | 0.000                 |  |
| McGurk et al. 2005                 | 0.099                     | 0.297          | 0.088    | -0.482      | 0.680       | 0.334   | 0.738                 |  |
| McGurk et al. 2016                 | -0.042                    | 0.277          | 0.077    | -0.585      | 0.501       | -0.150  | 0.880                 |  |
| Mendella et al. 2015               | 0.386                     | 0.383          | 0.147    | -0.365      | 1.138       | 1.008   | 0.314                 |  |
| O'Reilly et al. 2019               | 0.080                     | 0.245          | 0.060    | -0.401      | 0.560       | 0.324   | 0.746                 |  |
| Omiya et al. 2016                  | -0.194                    | 0.462          | 0.214    | -1.100      | 0.713       | -0.419  | 0.675                 |  |
| Ostergaard Christensen et al. 2014 | 0.225                     | 0.201          | 0.041    | -0.169      | 0.620       | 1.119   | 0.263                 |  |
| Penadés et al. 2013                | 0.312                     | 0.333          | 0.111    | -0.340      | 0.964       | 0.938   | 0.348                 |  |
| Pontes et al. 2013                 | 0.162                     | 0.462          | 0.213    | -0.744      | 1.067       | 0.350   | 0.727                 |  |
| Popova et al. 2014                 | 0.460                     | 0.322          | 0.104    | -0.171      | 1.091       | 1.429   | 0.153                 |  |
| Reeder et al. 2017                 | 0.380                     | 0.216          | 0.047    | -0.043      | 0.803       | 1.762   | 0.078                 |  |
| Royer et al. 2012                  | 0.704                     | 0.306          | 0.094    | 0.105       | 1.304       | 2.303   | 0.021                 |  |
| Tan et al. 2019                    | 0.404                     | 0.128          | 0.016    | 0.152       | 0.655       | 3.149   | 0.002                 |  |
| Tan et al. 2016                    | 0.575                     | 0.213          | 0.046    | 0.157       | 0.993       | 2.695   | 0.007                 |  |
| Thomas et al. 2018                 | 0.255                     | 0.326          | 0.106    | -0.384      | 0.894       | 0.782   | 0.434                 |  |
| Twanley et al. 2012                | 0.519                     | 0.308          | 0.095    | -0.085      | 1.124       | 1.684   | 0.092                 |  |
| Vauth et al. 2005                  | 0.582                     | 0.253          | 0.064    | 0.087       | 1.077       | 2.304   | 0.021                 |  |
| Wykes and Newton et al. 2007       | 0.649                     | 0.355          | 0.126    | -0.046      | 1.345       | 1.831   | 0.067                 |  |
| Wykes et al. 1999                  | 0.485                     | 0.361          | 0.130    | -0.222      | 1.192       | 1.345   | 0.179                 |  |
| Wykes et al. 2007                  | -0.043                    | 0.230          | 0.053    | -0.494      | 0.408       | -0.187  | 0.852                 |  |
|                                    | 0.270                     | 0.037          | 0.001    | 0.197       | 0.342       | 7.311   | 0.000                 |  |

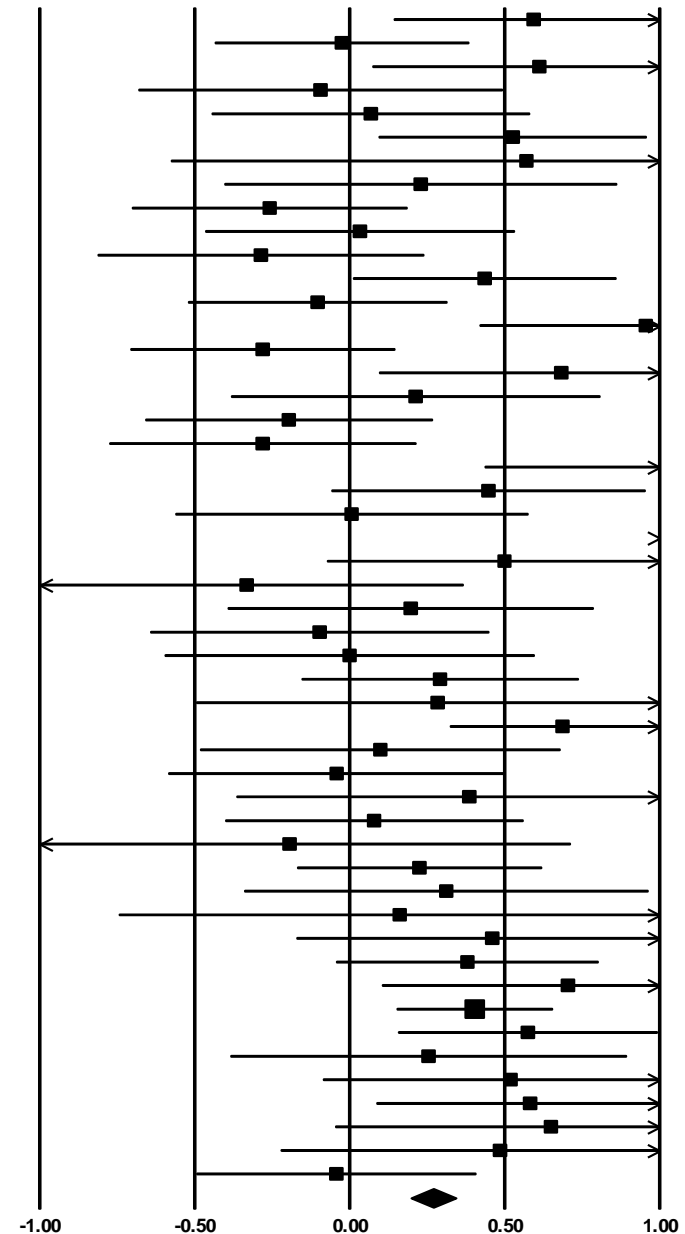

# Verbal Learning and Memory Effects

| Study name                         | Statistics for each study |                |          |             |             |         |       |
|------------------------------------|---------------------------|----------------|----------|-------------|-------------|---------|-------|
|                                    | Hedges's g                | Standard error | Variance | Lower limit | Upper limit | p-Value |       |
| Ahmed et al. 2015                  | 0.711                     | 0.232          | 0.054    | 0.257       | 1.166       | 3.066   | 0.002 |
| Au et al. 2015                     | 0.356                     | 0.211          | 0.044    | -0.057      | 0.769       | 1.688   | 0.091 |
| Balzan et al. 2019                 | -0.047                    | 0.268          | 0.072    | -0.572      | 0.479       | -0.174  | 0.862 |
| Bellucci et al. 2002               | 0.602                     | 0.343          | 0.117    | -0.070      | 1.274       | 1.757   | 0.079 |
| Benedict et al. 1994               | 0.121                     | 0.340          | 0.116    | -0.545      | 0.788       | 0.357   | 0.721 |
| Bryce et al. 2018                  | 0.057                     | 0.300          | 0.090    | -0.530      | 0.644       | 0.189   | 0.850 |
| Bucci et al. 2013                  | 0.835                     | 0.273          | 0.074    | 0.300       | 1.369       | 3.060   | 0.002 |
| Burda et al. 1994                  | 0.776                     | 0.250          | 0.063    | 0.286       | 1.266       | 3.105   | 0.002 |
| Byrne et al. 2013                  | 0.715                     | 0.363          | 0.132    | 0.004       | 1.427       | 1.970   | 0.049 |
| Cavallaro et al. 2009              | 0.477                     | 0.220          | 0.048    | 0.047       | 0.908       | 2.173   | 0.030 |
| Cavallo et al. 2013                | 0.868                     | 0.603          | 0.364    | -0.314      | 2.051       | 1.439   | 0.150 |
| Choi et al. 2018                   | 0.339                     | 0.324          | 0.105    | -0.296      | 0.975       | 1.046   | 0.295 |
| d'Amato et al. 2011                | 0.444                     | 0.228          | 0.052    | -0.004      | 0.892       | 1.943   | 0.052 |
| Dickinson et al. 2010              | -0.046                    | 0.255          | 0.065    | -0.545      | 0.453       | -0.182  | 0.856 |
| Donohoe et al. 2017                | 0.244                     | 0.268          | 0.072    | -0.281      | 0.769       | 0.911   | 0.362 |
| Fisher et al. 2014                 | 0.365                     | 0.216          | 0.046    | -0.058      | 0.787       | 1.692   | 0.091 |
| Fisher et al. 2016                 | 0.227                     | 0.214          | 0.046    | -0.191      | 0.646       | 1.064   | 0.287 |
| Fiszdon et al. 2016                | 0.407                     | 0.262          | 0.069    | -0.107      | 0.921       | 1.552   | 0.121 |
| Garcia-Fernandez et al. 2019       | -0.112                    | 0.217          | 0.047    | -0.536      | 0.313       | -0.515  | 0.607 |
| Garrido et al. 2013                | 0.129                     | 0.292          | 0.085    | -0.443      | 0.701       | 0.442   | 0.658 |
| Gharaeipour et al. 2012            | 0.854                     | 0.317          | 0.100    | 0.233       | 1.475       | 2.696   | 0.007 |
| Gomar et al. 2015                  | -0.068                    | 0.236          | 0.056    | -0.531      | 0.394       | -0.289  | 0.772 |
| Greig et al. 2007                  | 0.037                     | 0.251          | 0.063    | -0.455      | 0.530       | 0.149   | 0.882 |
| Hodge et al. 2010                  | 0.503                     | 0.317          | 0.100    | -0.118      | 1.123       | 1.589   | 0.112 |
| Holzer et al. 2014                 | -0.522                    | 0.353          | 0.125    | -1.215      | 0.171       | -1.477  | 0.140 |
| Iwata et al. 2017                  | 0.570                     | 0.260          | 0.068    | 0.060       | 1.080       | 2.192   | 0.028 |
| Jahshan et al. 2019                | -0.009                    | 0.290          | 0.084    | -0.578      | 0.560       | -0.032  | 0.974 |
| Katsumi et al. 2019                | 1.197                     | 0.322          | 0.104    | 0.565       | 1.829       | 3.712   | 0.000 |
| Keefe et al. 2012                  | 0.279                     | 0.289          | 0.083    | -0.287      | 0.845       | 0.966   | 0.334 |
| Kidd et al. 2014                   | 0.519                     | 0.361          | 0.130    | -0.188      | 1.225       | 1.439   | 0.150 |
| Kukla et al. 2018                  | 0.293                     | 0.302          | 0.091    | -0.298      | 0.885       | 0.972   | 0.331 |
| Kurtz et al. 2007                  | -0.625                    | 0.312          | 0.097    | -1.236      | -0.014      | -2.006  | 0.045 |
| Kurtz et al. 2015                  | 0.147                     | 0.269          | 0.073    | -0.381      | 0.675       | 0.546   | 0.585 |
| Lindenmeyer et al. 2008            | 0.326                     | 0.233          | 0.054    | -0.131      | 0.783       | 1.399   | 0.162 |
| López-Luengo et al. 2003           | 0.358                     | 0.399          | 0.159    | -0.423      | 1.140       | 0.898   | 0.369 |
| McGurk et al. 2005                 | 0.486                     | 0.301          | 0.091    | -0.104      | 1.075       | 1.614   | 0.106 |
| McGurk et al. 2016                 | 0.586                     | 0.283          | 0.080    | 0.031       | 1.140       | 2.068   | 0.039 |
| Medalia et al. 2000                | -0.168                    | 0.327          | 0.107    | -0.808      | 0.472       | -0.514  | 0.607 |
| Mendella et al. 2015               | 0.497                     | 0.386          | 0.149    | -0.259      | 1.253       | 1.289   | 0.198 |
| Moritz et al. 2013                 | 0.141                     | 0.175          | 0.031    | -0.203      | 0.484       | 0.802   | 0.423 |
| Moritz et al. 2015                 | -0.244                    | 0.287          | 0.082    | -0.807      | 0.318       | -0.851  | 0.395 |
| Omiya et al. 2016                  | 2.153                     | 0.591          | 0.349    | 0.995       | 3.312       | 3.645   | 0.000 |
| O'Reilly et al. 2019               | 0.253                     | 0.246          | 0.061    | -0.229      | 0.736       | 1.029   | 0.303 |
| Ostergaard Christensen et al. 2014 | 0.452                     | 0.203          | 0.041    | 0.054       | 0.850       | 2.225   | 0.026 |
| Penadés et al. 2006                | 1.144                     | 0.368          | 0.135    | 0.423       | 1.865       | 3.109   | 0.002 |
| Penadés et al. 2013                | -0.287                    | 0.332          | 0.110    | -0.938      | 0.364       | -0.864  | 0.388 |
| Penadés et al. 2018                | 0.215                     | 0.246          | 0.060    | -0.267      | 0.697       | 0.874   | 0.382 |
| Pontes et al. 2013                 | 0.000                     | 0.461          | 0.213    | -0.904      | 0.904       | 0.000   | 1.000 |
| Popova et al. 2014                 | -0.201                    | 0.318          | 0.101    | -0.825      | 0.424       | -0.630  | 0.529 |
| Puig et al. 2014                   | 0.099                     | 0.356          | 0.126    | -0.598      | 0.795       | 0.277   | 0.782 |
| Rass et al. 2012                   | 0.029                     | 0.335          | 0.112    | -0.627      | 0.686       | 0.087   | 0.931 |
| Royer et al. 2012                  | 0.952                     | 0.313          | 0.098    | 0.338       | 1.565       | 3.040   | 0.002 |
| Sartory et al. 2005                | 0.741                     | 0.313          | 0.098    | 0.126       | 1.355       | 2.363   | 0.018 |
| Silverstein et al. 2005            | 0.550                     | 0.361          | 0.131    | -0.158      | 1.258       | 1.523   | 0.128 |
| Tan et al. 2013                    | 1.425                     | 0.313          | 0.098    | 0.811       | 2.038       | 4.553   | 0.000 |
| Tan et al. 2016                    | 0.258                     | 0.210          | 0.044    | -0.153      | 0.670       | 1.229   | 0.219 |
| Tan et al. 2019                    | 0.193                     | 0.127          | 0.016    | -0.056      | 0.443       | 1.520   | 0.129 |
| Thomas et al. 2018                 | 0.466                     | 0.329          | 0.108    | -0.179      | 1.111       | 1.415   | 0.157 |
| Twamley et al. 2012                | 0.138                     | 0.298          | 0.089    | -0.445      | 0.722       | 0.465   | 0.642 |
| Vauth et al. 2005                  | 0.507                     | 0.251          | 0.063    | 0.014       | 1.000       | 2.017   | 0.044 |
| Wölwer et al. 2005                 | 0.405                     | 0.284          | 0.081    | -0.152      | 0.962       | 1.425   | 0.154 |
|                                    | 0.315                     | 0.035          | 0.001    | 0.247       | 0.383       | 9.090   | 0.000 |

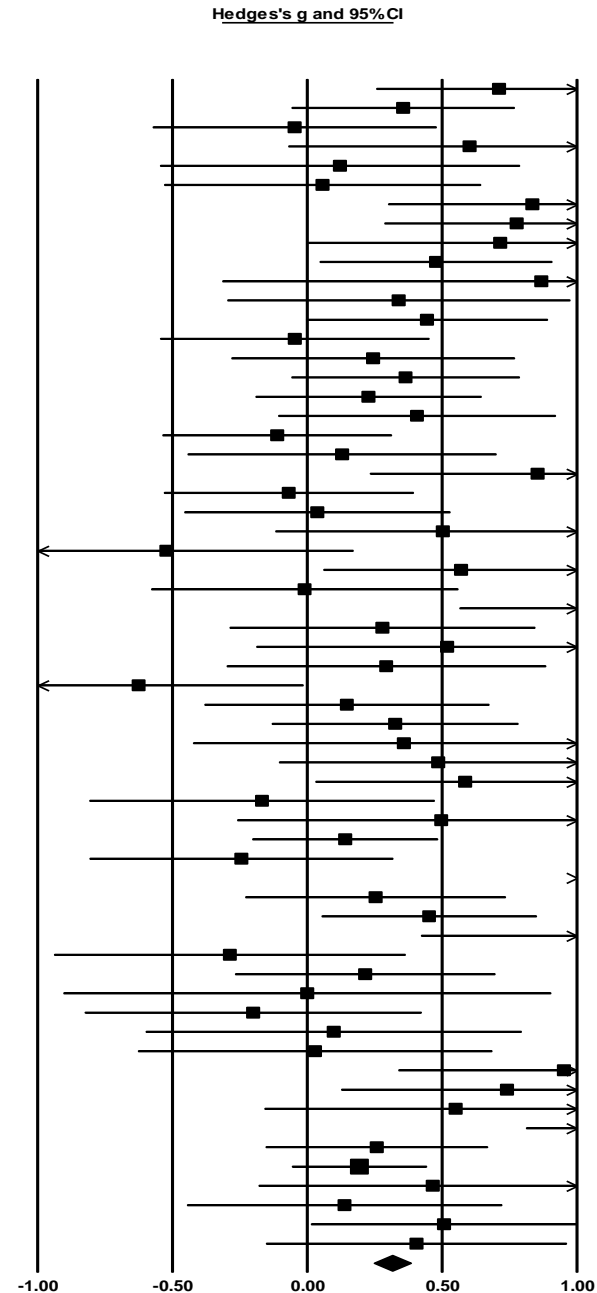

# Visual Learning and Memory Effects

## Study name

## Statistics for each study

## Hedges's g and 95% CI

| Study name                         | Hedges's g | Standard error | Variance | Lower limit | Upper limit | Z-Value | p-Value |
|------------------------------------|------------|----------------|----------|-------------|-------------|---------|---------|
| Ahmed et al. 2015                  | 0.097      | 0.225          | 0.051    | -0.344      | 0.538       | 0.430   | 0.667   |
| Au et al. 2015                     | 0.475      | 0.212          | 0.045    | 0.060       | 0.891       | 2.241   | 0.025   |
| Bryce et al. 2018                  | 0.423      | 0.303          | 0.092    | -0.171      | 1.016       | 1.395   | 0.163   |
| Bucci et al. 2013                  | 1.488      | 0.296          | 0.088    | 0.908       | 2.068       | 5.030   | 0.000   |
| Burda et al. 1994                  | -0.251     | 0.242          | 0.059    | -0.726      | 0.223       | -1.037  | 0.300   |
| d'Amato et al. 2011                | 0.000      | 0.226          | 0.051    | -0.442      | 0.442       | 0.000   | 1.000   |
| Fisher et al. 2014                 | 0.228      | 0.214          | 0.046    | -0.192      | 0.649       | 1.064   | 0.287   |
| Fisher et al. 2016                 | -0.081     | 0.213          | 0.045    | -0.499      | 0.336       | -0.383  | 0.702   |
| Fiszdon et al. 2016                | 0.801      | 0.269          | 0.073    | 0.273       | 1.329       | 2.973   | 0.003   |
| Garcia-Fernandez et al. 2019       | -0.216     | 0.217          | 0.047    | -0.642      | 0.210       | -0.995  | 0.320   |
| Gharaeipour et al. 2012            | 0.701      | 0.312          | 0.098    | 0.089       | 1.314       | 2.246   | 0.025   |
| Gomar et al. 2015                  | 0.131      | 0.236          | 0.056    | -0.332      | 0.594       | 0.553   | 0.580   |
| Greig et al. 2007                  | 0.315      | 0.253          | 0.064    | -0.181      | 0.811       | 1.245   | 0.213   |
| Jahshan et al. 2019                | -0.323     | 0.292          | 0.085    | -0.895      | 0.250       | -1.105  | 0.269   |
| Keefe et al. 2012                  | 0.190      | 0.288          | 0.083    | -0.374      | 0.755       | 0.661   | 0.509   |
| Kukla et al. 2018                  | 0.324      | 0.302          | 0.091    | -0.268      | 0.917       | 1.074   | 0.283   |
| Kurtz et al. 2007                  | -0.563     | 0.310          | 0.096    | -1.171      | 0.045       | -1.815  | 0.070   |
| Mendella et al. 2015               | 0.412      | 0.384          | 0.147    | -0.340      | 1.165       | 1.074   | 0.283   |
| O'Reilly et al. 2019               | 0.739      | 0.254          | 0.064    | 0.242       | 1.236       | 2.916   | 0.004   |
| Ostergaard Christensen et al. 2014 | 0.172      | 0.201          | 0.040    | -0.222      | 0.566       | 0.856   | 0.392   |
| Penadés et al. 2006                | 0.714      | 0.351          | 0.123    | 0.026       | 1.402       | 2.034   | 0.042   |
| Penadés et al. 2018                | 0.202      | 0.246          | 0.060    | -0.280      | 0.684       | 0.822   | 0.411   |
| Penadés et al. 2013                | -0.279     | 0.332          | 0.110    | -0.930      | 0.372       | -0.841  | 0.400   |
| Pontes et al. 2013                 | 0.076      | 0.461          | 0.213    | -0.829      | 0.980       | 0.164   | 0.870   |
| Popova et al. 2014                 | 0.311      | 0.320          | 0.102    | -0.316      | 0.937       | 0.973   | 0.331   |
| Puig et al. 2014                   | 0.071      | 0.355          | 0.126    | -0.625      | 0.768       | 0.201   | 0.841   |
| Rass et al. 2012                   | -0.656     | 0.344          | 0.118    | -1.331      | 0.019       | -1.906  | 0.057   |
| Reeder et al. 2017                 | 0.174      | 0.213          | 0.045    | -0.243      | 0.591       | 0.817   | 0.414   |
| Tan et al. 2019                    | -0.015     | 0.127          | 0.016    | -0.264      | 0.234       | -0.119  | 0.905   |
| Tan et al. 2016                    | 0.670      | 0.215          | 0.046    | 0.249       | 1.092       | 3.119   | 0.002   |
| Thomas et al. 2018                 | -0.091     | 0.325          | 0.106    | -0.728      | 0.545       | -0.281  | 0.779   |
| Wölwer et al. 2005                 | 0.106      | 0.281          | 0.079    | -0.446      | 0.657       | 0.376   | 0.707   |
| Wykes et al. 1999                  | -0.055     | 0.394          | 0.155    | -0.827      | 0.718       | -0.139  | 0.890   |
|                                    | 0.177      | 0.044          | 0.002    | 0.091       | 0.264       | 4.021   | 0.000   |

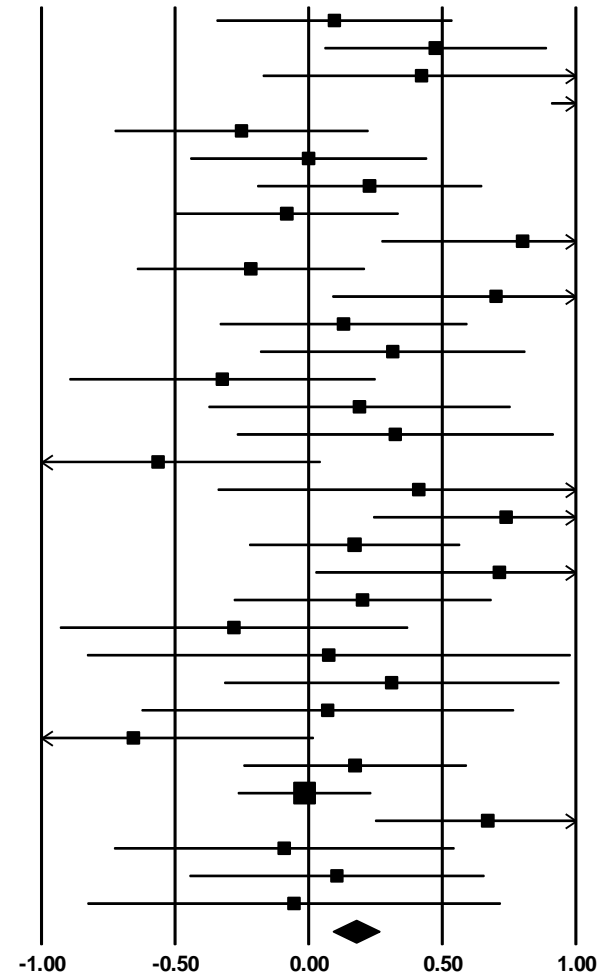

# Working Memory Effects

| Study name                   | Statistics for each study |                |          |             |             |         |         |
|------------------------------|---------------------------|----------------|----------|-------------|-------------|---------|---------|
|                              | Hedges's g                | Standard error | Variance | Lower limit | Upper limit | Z-Value | p-Value |
| Ahmed et al. 2015            | 0.659                     | 0.231          | 0.053    | 0.207       | 1.112       | 2.855   | 0.004   |
| Balzan et al. 2019           | 0.061                     | 0.268          | 0.072    | -0.465      | 0.587       | 0.226   | 0.821   |
| Bellucci et al. 2002         | 0.537                     | 0.341          | 0.116    | -0.132      | 1.206       | 1.574   | 0.115   |
| Bryce et al. 2018            | 0.285                     | 0.301          | 0.091    | -0.305      | 0.875       | 0.947   | 0.344   |
| Bucci et al. 2013            | -0.008                    | 0.262          | 0.068    | -0.521      | 0.505       | -0.031  | 0.975   |
| Burda et al. 1994            | 0.541                     | 0.246          | 0.060    | 0.060       | 1.022       | 2.203   | 0.028   |
| Byrne et al. 2013            | 1.723                     | 0.414          | 0.171    | 0.911       | 2.534       | 4.161   | 0.000   |
| Cavallaro et al. 2009        | 0.342                     | 0.218          | 0.048    | -0.086      | 0.770       | 1.567   | 0.117   |
| Cavallo et al. 2013          | 0.996                     | 0.613          | 0.376    | -0.206      | 2.198       | 1.624   | 0.104   |
| Choi et al. 2018             | 0.237                     | 0.323          | 0.104    | -0.396      | 0.871       | 0.735   | 0.462   |
| d'Amato et al. 2011          | 0.208                     | 0.226          | 0.051    | -0.236      | 0.651       | 0.919   | 0.358   |
| Dickinson et al. 2010        | 0.101                     | 0.255          | 0.065    | -0.398      | 0.600       | 0.398   | 0.691   |
| Donohoe et al. 2017          | 0.474                     | 0.271          | 0.073    | -0.057      | 1.005       | 1.750   | 0.080   |
| Fisher et al. 2014           | 0.286                     | 0.215          | 0.046    | -0.135      | 0.707       | 1.331   | 0.183   |
| Fisher et al. 2016           | -0.027                    | 0.213          | 0.045    | -0.444      | 0.390       | -0.127  | 0.899   |
| Fiszdon et al. 2016          | 0.811                     | 0.270          | 0.073    | 0.283       | 1.340       | 3.009   | 0.003   |
| Garcia-Femadex et al. 2019   | -0.156                    | 0.217          | 0.047    | -0.581      | 0.269       | -0.720  | 0.471   |
| Garrido et al. 2013          | 0.595                     | 0.298          | 0.089    | 0.011       | 1.178       | 1.997   | 0.046   |
| Gharaeipour et al. 2012      | 0.418                     | 0.306          | 0.094    | -0.182      | 1.018       | 1.365   | 0.172   |
| Gomar et al. 2015            | 0.035                     | 0.236          | 0.056    | -0.427      | 0.498       | 0.150   | 0.881   |
| Greig et al. 2007            | 0.518                     | 0.256          | 0.065    | 0.017       | 1.019       | 2.025   | 0.043   |
| Hodge et al. 2010            | 0.614                     | 0.319          | 0.102    | -0.011      | 1.239       | 1.925   | 0.054   |
| Iwata et al. 2017            | 0.348                     | 0.257          | 0.066    | -0.156      | 0.851       | 1.353   | 0.176   |
| Jahshan et al. 2019          | -0.015                    | 0.290          | 0.084    | -0.584      | 0.554       | -0.052  | 0.958   |
| Katsumi et al. 2019          | 1.534                     | 0.338          | 0.114    | 0.871       | 2.197       | 4.535   | 0.000   |
| Keefe et al. 2012            | 0.048                     | 0.287          | 0.083    | -0.515      | 0.612       | 0.168   | 0.866   |
| Kidd et al. 2014             | -0.009                    | 0.354          | 0.126    | -0.704      | 0.685       | -0.026  | 0.979   |
| Kukla et al. 2018            | 0.171                     | 0.301          | 0.090    | -0.419      | 0.760       | 0.568   | 0.570   |
| Kurtz et al. 2015            | 0.453                     | 0.268          | 0.072    | -0.072      | 0.978       | 1.692   | 0.091   |
| Kurtz et al. 2007            | -0.082                    | 0.304          | 0.093    | -0.678      | 0.515       | -0.269  | 0.788   |
| Lee 2013                     | 0.372                     | 0.257          | 0.066    | -0.132      | 0.876       | 1.448   | 0.147   |
| Lindenmayer et al. 2008      | 0.273                     | 0.230          | 0.053    | -0.178      | 0.724       | 1.186   | 0.236   |
| López-Luengo et al. 2003     | 0.151                     | 0.396          | 0.157    | -0.625      | 0.928       | 0.382   | 0.702   |
| Maak et al. 2013             | 0.624                     | 0.226          | 0.051    | 0.182       | 1.066       | 2.766   | 0.006   |
| McGurk et al. 2005           | 0.592                     | 0.303          | 0.092    | -0.002      | 1.186       | 1.953   | 0.051   |
| McGurk et al. 2016           | 0.199                     | 0.278          | 0.077    | -0.345      | 0.743       | 0.716   | 0.474   |
| Mendella et al. 2015         | 0.507                     | 0.386          | 0.149    | -0.250      | 1.264       | 1.313   | 0.189   |
| Mortiz et al. 2013           | 0.376                     | 0.177          | 0.031    | 0.030       | 0.723       | 2.129   | 0.033   |
| O'Reilly et al. 2019         | 0.319                     | 0.247          | 0.061    | -0.164      | 0.803       | 1.294   | 0.196   |
| Omiya et al. 2016            | 1.378                     | 0.518          | 0.269    | 0.362       | 2.394       | 2.659   | 0.008   |
| Ostergaard et al. 2014       | 0.283                     | 0.202          | 0.041    | -0.112      | 0.679       | 1.406   | 0.160   |
| Penadés et al. 2006          | 0.761                     | 0.353          | 0.124    | 0.071       | 1.452       | 2.160   | 0.031   |
| Penadés et al. 2018          | 0.031                     | 0.245          | 0.060    | -0.450      | 0.511       | 0.126   | 0.899   |
| Penadés et al. 2013          | -0.269                    | 0.332          | 0.110    | -0.919      | 0.382       | -0.809  | 0.419   |
| Pontes et al. 2013           | -0.032                    | 0.461          | 0.213    | -0.936      | 0.872       | -0.069  | 0.945   |
| Popova et al. 2014           | -0.138                    | 0.318          | 0.101    | -0.761      | 0.485       | -0.434  | 0.664   |
| Puig et al. 2014             | 0.141                     | 0.356          | 0.127    | -0.556      | 0.839       | 0.397   | 0.691   |
| Ramsay et al. 2017           | 0.785                     | 0.396          | 0.157    | 0.009       | 1.562       | 1.982   | 0.047   |
| Rass et al. 2012             | -0.045                    | 0.335          | 0.112    | -0.702      | 0.611       | -0.135  | 0.892   |
| Reeder et al. 2017           | 0.241                     | 0.213          | 0.046    | -0.177      | 0.659       | 1.129   | 0.259   |
| Royer et al. 2012            | 0.681                     | 0.305          | 0.093    | 0.083       | 1.280       | 2.232   | 0.026   |
| Sartory et al. 2005          | 0.672                     | 0.312          | 0.097    | 0.061       | 1.282       | 2.156   | 0.031   |
| Silverstein et al. 2005      | 0.593                     | 0.362          | 0.131    | -0.117      | 1.303       | 1.636   | 0.102   |
| Tan et al. 2013              | 0.471                     | 0.283          | 0.080    | -0.083      | 1.025       | 1.667   | 0.095   |
| Tan et al. 2019              | 0.375                     | 0.128          | 0.016    | 0.124       | 0.626       | 2.930   | 0.003   |
| Tan et al. 2016              | 0.393                     | 0.211          | 0.045    | -0.021      | 0.806       | 1.860   | 0.063   |
| Thomas et al. 2018           | -0.048                    | 0.325          | 0.105    | -0.684      | 0.589       | -0.147  | 0.883   |
| Twamley et al. 2012          | 0.061                     | 0.297          | 0.088    | -0.522      | 0.643       | 0.204   | 0.839   |
| Wölwer et al. 2005           | 0.047                     | 0.281          | 0.079    | -0.504      | 0.599       | 0.169   | 0.866   |
| Wykes and Newton et al. 2007 | 0.000                     | 0.345          | 0.119    | -0.675      | 0.675       | 0.000   | 1.000   |
| Wykes et al. 1999            | 0.124                     | 0.356          | 0.126    | -0.573      | 0.821       | 0.349   | 0.727   |
| Wykes et al. 2007            | 0.210                     | 0.226          | 0.051    | -0.234      | 0.654       | 0.928   | 0.353   |
|                              | 0.315                     | 0.034          | 0.001    | 0.248       | 0.382       | 9.247   | 0.000   |

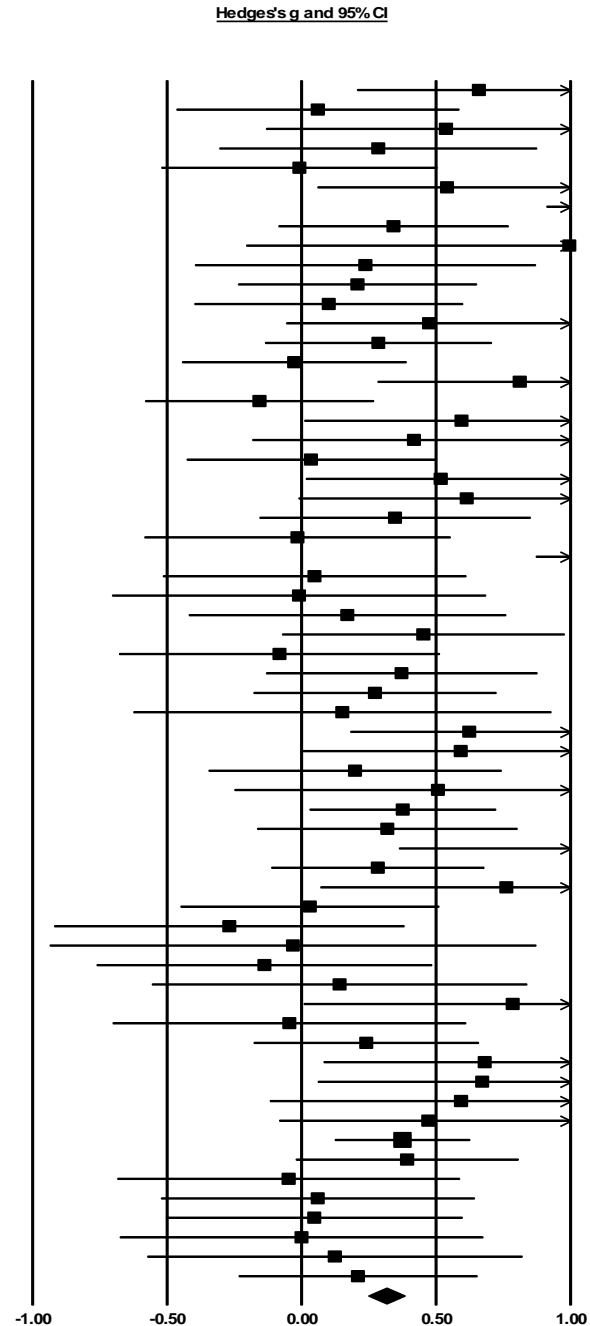

# Negative Symptom Effects

## Study name

## Statistics for each study

## Hedges's g and 95% CI

|                                    | Hedges's g | Standard error | Variance | Lower limit | Upper limit | Z-Value | p-Value |
|------------------------------------|------------|----------------|----------|-------------|-------------|---------|---------|
| Ahmed et al. 2015                  | 0.187      | 0.225          | 0.051    | -0.255      | 0.628       | 0.829   | 0.407   |
| Balzan et al. 2019                 | -0.460     | 0.272          | 0.074    | -0.993      | 0.073       | -1.692  | 0.091   |
| Bellucci et al. 2002               | 0.556      | 0.342          | 0.117    | -0.114      | 1.225       | 1.627   | 0.104   |
| Byrne et al. 2013                  | 0.608      | 0.360          | 0.130    | -0.097      | 1.313       | 1.689   | 0.091   |
| Choi et al. 2018                   | 0.045      | 0.322          | 0.104    | -0.585      | 0.676       | 0.141   | 0.888   |
| d'Amato et al. 2011                | -0.137     | 0.226          | 0.051    | -0.580      | 0.306       | -0.606  | 0.544   |
| Dickinson et al. 2010              | 0.237      | 0.255          | 0.065    | -0.264      | 0.737       | 0.928   | 0.354   |
| Fiszdon et al. 2016                | 0.577      | 0.265          | 0.070    | 0.058       | 1.096       | 2.180   | 0.029   |
| Gharajepour et al. 2012            | 1.791      | 0.360          | 0.130    | 1.085       | 2.497       | 4.970   | 0.000   |
| Holzer et al. 2014                 | -0.142     | 0.348          | 0.121    | -0.824      | 0.539       | -0.410  | 0.682   |
| Horan et al. 2011                  | 0.420      | 0.321          | 0.103    | -0.210      | 1.049       | 1.306   | 0.192   |
| Iwata et al. 2017                  | 0.616      | 0.261          | 0.068    | 0.104       | 1.128       | 2.360   | 0.018   |
| Katsumi et al. 2019                | 0.024      | 0.296          | 0.088    | -0.556      | 0.604       | 0.081   | 0.936   |
| Kidd et al. 2014                   | 0.287      | 0.356          | 0.127    | -0.411      | 0.986       | 0.806   | 0.420   |
| Lee 2013                           | 0.034      | 0.255          | 0.065    | -0.466      | 0.533       | 0.132   | 0.895   |
| McGurk et al. 2005                 | 0.365      | 0.299          | 0.089    | -0.221      | 0.951       | 1.222   | 0.222   |
| McGurk et al. 2016                 | 0.340      | 0.279          | 0.078    | -0.207      | 0.887       | 1.218   | 0.223   |
| Mendella et al. 2015               | -0.297     | 0.382          | 0.146    | -1.046      | 0.451       | -0.779  | 0.436   |
| O'Reilly et al. 2019               | -0.007     | 0.245          | 0.060    | -0.488      | 0.473       | -0.030  | 0.976   |
| Ostergaard Christensen et al. 2014 | 0.050      | 0.201          | 0.040    | -0.344      | 0.443       | 0.247   | 0.805   |
| Penadés et al. 2006                | 0.110      | 0.340          | 0.116    | -0.557      | 0.776       | 0.322   | 0.747   |
| Pontes et al. 2013                 | 0.217      | 0.463          | 0.214    | -0.690      | 1.124       | 0.469   | 0.639   |
| Reeder et al. 2017                 | -0.104     | 0.213          | 0.045    | -0.521      | 0.313       | -0.490  | 0.624   |
| Silverstein et al. 2005            | -0.463     | 0.359          | 0.129    | -1.167      | 0.241       | -1.289  | 0.197   |
| Silverstein et al. 2014            | 0.308      | 0.222          | 0.049    | -0.127      | 0.743       | 1.387   | 0.165   |
| Tan et al. 2016                    | -0.188     | 0.210          | 0.044    | -0.598      | 0.223       | -0.896  | 0.370   |
| Tan et al. 2019                    | 0.268      | 0.128          | 0.016    | 0.018       | 0.519       | 2.105   | 0.035   |
| Thomas et al. 2018                 | -0.011     | 0.325          | 0.105    | -0.647      | 0.625       | -0.034  | 0.973   |
| Twanley et al. 2012                | 0.479      | 0.302          | 0.091    | -0.112      | 1.070       | 1.588   | 0.112   |
| Vauth et al. 2005                  | -0.053     | 0.248          | 0.061    | -0.538      | 0.433       | -0.212  | 0.832   |
| Wykes et al. 2007                  | -0.031     | 0.222          | 0.049    | -0.465      | 0.404       | -0.138  | 0.890   |
|                                    | 0.154      | 0.047          | 0.002    | 0.063       | 0.246       | 3.310   | 0.001   |

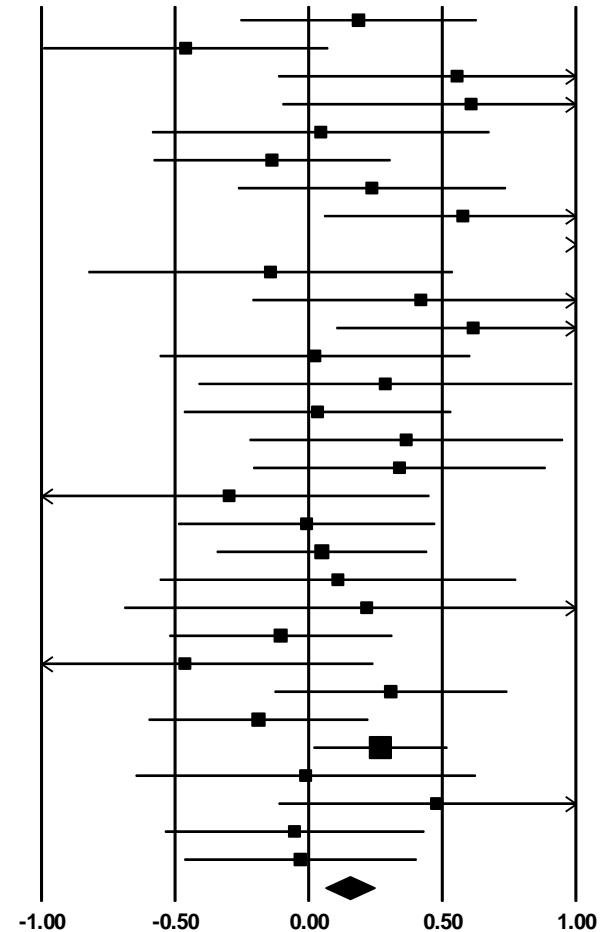

# Functional Outcome Effects

| Study name                   | Statistics for each study |                |          |             |             |         | Hedges's g and 95% CI |  |
|------------------------------|---------------------------|----------------|----------|-------------|-------------|---------|-----------------------|--|
|                              | Hedges's g                | Standard error | Variance | Lower limit | Upper limit | Z-Value | p-Value               |  |
| Au et al. 2015               | -0.164                    | 0.209          | 0.044    | -0.575      | 0.246       | -0.785  | 0.432                 |  |
| Bryce et al. 2018            | -1.122                    | 0.323          | 0.104    | -1.755      | -0.489      | -3.474  | 0.001                 |  |
| Bucci et al. 2013            | -0.062                    | 0.262          | 0.068    | -0.575      | 0.451       | -0.236  | 0.814                 |  |
| Byrne et al. 2013            | 0.777                     | 0.365          | 0.133    | 0.062       | 1.493       | 2.130   | 0.033                 |  |
| Cavallaro et al. 2009        | 0.287                     | 0.218          | 0.047    | -0.139      | 0.714       | 1.320   | 0.187                 |  |
| Donohoe et al. 2017          | 0.587                     | 0.273          | 0.074    | 0.052       | 1.121       | 2.151   | 0.031                 |  |
| Drake et al. 2014            | -0.215                    | 0.326          | 0.106    | -0.854      | 0.424       | -0.660  | 0.509                 |  |
| Fisher et al. 2014           | -0.169                    | 0.214          | 0.046    | -0.588      | 0.251       | -0.788  | 0.431                 |  |
| Fisher et al. 2016           | -0.010                    | 0.213          | 0.045    | -0.427      | 0.407       | -0.048  | 0.962                 |  |
| Fiszdon et al. 2016          | 0.696                     | 0.267          | 0.071    | 0.173       | 1.220       | 2.608   | 0.009                 |  |
| Garcia-Fernandez et al. 2019 | -0.075                    | 0.217          | 0.047    | -0.499      | 0.350       | -0.345  | 0.730                 |  |
| Garrido et al. 2013          | 0.689                     | 0.300          | 0.090    | 0.101       | 1.277       | 2.298   | 0.022                 |  |
| Holzer et al. 2014           | -0.069                    | 0.347          | 0.121    | -0.750      | 0.612       | -0.198  | 0.843                 |  |
| Iwata et al. 2017            | 0.748                     | 0.264          | 0.070    | 0.231       | 1.266       | 2.835   | 0.005                 |  |
| Katsumi et al. 2019          | 0.204                     | 0.297          | 0.088    | -0.377      | 0.786       | 0.689   | 0.491                 |  |
| Kidd et al. 2014             | 0.246                     | 0.356          | 0.127    | -0.452      | 0.943       | 0.691   | 0.490                 |  |
| Kukla et al. 2018            | 0.523                     | 0.305          | 0.093    | -0.075      | 1.122       | 1.714   | 0.087                 |  |
| Kurtz et al. 2015            | 0.102                     | 0.284          | 0.081    | -0.455      | 0.660       | 0.359   | 0.719                 |  |
| Lee 2013                     | 0.086                     | 0.255          | 0.065    | -0.413      | 0.586       | 0.338   | 0.735                 |  |
| Lu et al. 2012               | 0.305                     | 0.181          | 0.033    | -0.050      | 0.660       | 1.686   | 0.092                 |  |
| McGurk et al. 2005           | 1.075                     | 0.318          | 0.101    | 0.452       | 1.698       | 3.383   | 0.001                 |  |
| Omiya et al. 2016            | 1.002                     | 0.492          | 0.242    | 0.037       | 1.966       | 2.035   | 0.042                 |  |
| O'Reilly et al. 2019         | 0.155                     | 0.246          | 0.060    | -0.326      | 0.637       | 0.633   | 0.527                 |  |
| Penadés et al. 2006          | 0.887                     | 0.357          | 0.127    | 0.188       | 1.587       | 2.486   | 0.013                 |  |
| Penadés et al. 2018          | 0.575                     | 0.250          | 0.063    | 0.084       | 1.065       | 2.297   | 0.022                 |  |
| Puig et al. 2014             | -0.116                    | 0.356          | 0.126    | -0.813      | 0.581       | -0.327  | 0.744                 |  |
| Reeder et al. 2017           | 0.356                     | 0.214          | 0.046    | -0.064      | 0.776       | 1.663   | 0.096                 |  |
| Royer et al. 2012            | 0.034                     | 0.297          | 0.088    | -0.548      | 0.616       | 0.114   | 0.909                 |  |
| Silverstein et al. 2014      | -0.017                    | 0.221          | 0.049    | -0.450      | 0.415       | -0.079  | 0.937                 |  |
| Tan et al. 2016              | -0.089                    | 0.209          | 0.044    | -0.499      | 0.321       | -0.426  | 0.670                 |  |
| Tan et al. 2019              | 0.405                     | 0.128          | 0.016    | 0.154       | 0.656       | 3.159   | 0.002                 |  |
| Wykes and Newton et al. 2007 | -0.146                    | 0.346          | 0.120    | -0.824      | 0.532       | -0.423  | 0.673                 |  |
| Wykes et al. 1999            | 0.055                     | 0.350          | 0.123    | -0.631      | 0.741       | 0.157   | 0.875                 |  |
| Wykes et al. 2007            | 0.173                     | 0.223          | 0.050    | -0.265      | 0.610       | 0.773   | 0.440                 |  |
|                              | 0.209                     | 0.043          | 0.002    | 0.124       | 0.293       | 4.833   | 0.000                 |  |

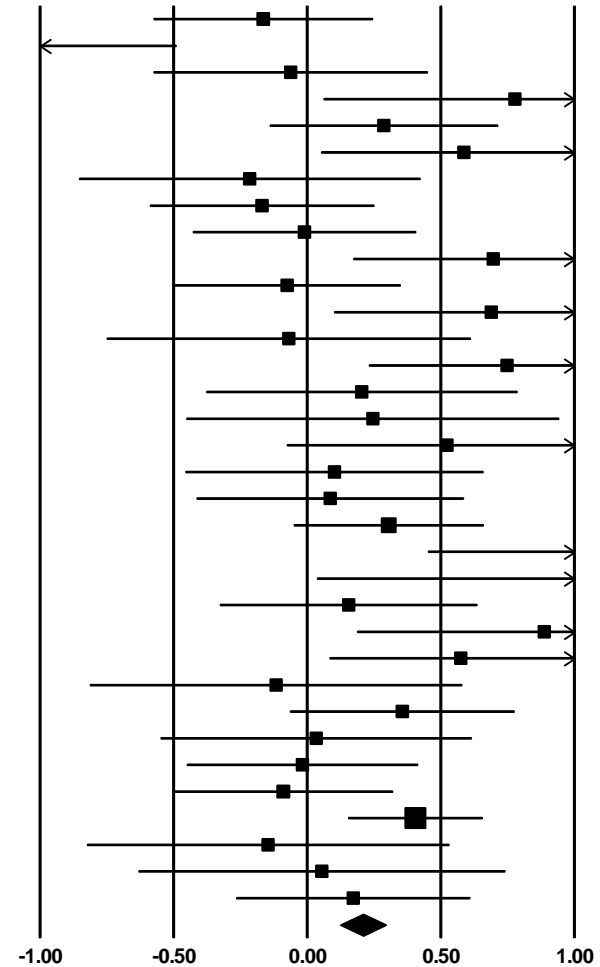

## Supplement 5: References of Included Studies

1. Ahmed AO, Hunter KM, Goodrum NM, Batten N-J, Birgenheir D, Hardison E, et al. A randomized study of cognitive remediation for forensic and mental health patients with schizophrenia. *J Psychiatr Res*. 2015 Sep 1;68:8–18.
2. Au DWH, Tsang HWH, So WWY, Bell MD, Cheung V, Yiu MGC, et al. Effects of integrated supported employment plus cognitive remediation training for people with schizophrenia and schizoaffective disorders. *Schizophr Res*. 2015 Aug 1;166(1):297–303.
3. Balzan RP, Mattiske JK, Delfabbro P, Liu D, Galletly C. Individualized Metacognitive Training (MCT+) Reduces Delusional Symptoms in Psychosis: A Randomized Clinical Trial. *Schizophr Bull*. 2019 Jan 1;45(1):27–36.
4. Bellucci DM. The effectiveness of computer-assisted cognitive rehabilitation for patients with chronic mental illness [Internet]. ProQuest Information & Learning; 2002. Available from: <http://search.ebscohost.com/login.aspx?direct=true&db=psyh&AN=2002-95006-060&site=ehost-live&scope=site>
5. Benedict RHB, Harris AE, Markow T, McCormick JA, Nuechterlein KH, Asarnow RF. Effects of Attention Training on Information Processing in Schizophrenia. *Schizophr Bull*. 1994 Jan 1;20(3):537–46.
6. Bryce SD, Rossell SL, Lee SJ, Lawrence RJ, Tan EJ, Carruthers SP, et al. “Neurocognitive and self-efficacy benefits of cognitive remediation in schizophrenia: A randomized controlled trial”: Corrigendum. *J Int Neuropsychol Soc*. 2019 Jul;25(6):b1–2.
7. Bucci P, Piegari G, Mucci A, Merlotti E, Chieffi M, De Riso F, et al. Neurocognitive individualized training versus social skills individualized training: A randomized trial in patients with schizophrenia. *Schizophr Res*. 2013 Oct;150(1):69–75.
8. Burda PC, Starkey TW, Dominguez F, Vera V. Computer-assisted cognitive rehabilitation of chronic psychiatric inpatients. *Comput Hum Behav*. 1994 Sep 1;10(3):359–68.
9. Byrne LK, Peng D, McCabe M, Mellor D, Zhang J, Zhang T, et al. Does practice make perfect? Results from a Chinese feasibility study of cognitive remediation in schizophrenia. *Neuropsychol Rehabil*. 2013;23(4):580–96.
10. Cavallaro R, Anselmetti S, Poletti S, Bechi M, Ermoli E, Cocchi F, et al. Computer-aided neurocognitive remediation as an enhancing strategy for schizophrenia rehabilitation. *Psychiatry Res*. 2009 Oct;169(3):191–6.
11. Cavallo M, Trivelli F, Mauro Adenzato, Bidoia E, Giaretto R, Oliva F, et al. Do neuropsychological and social cognition abilities in schizophrenia change after intensive cognitive training? A pilot study. *Clin Neuropsychiatry*. 2013 Dec 6;10:202–11.
12. Choi K-H, Kang J, Kim S-M, Lee S-H, Park S-C, Lee W-H, et al. Cognitive Remediation in Middle-Aged or Older Inpatients with Chronic Schizophrenia: A Randomized Controlled Trial in Korea. *Front Psychol*. 2018 Feb 6;8:2364.
13. d’Amato T, Bation R, Cochet A, Jalenques I, Galland F, Giraud-Baro E, et al. A randomized, controlled trial of computer-assisted cognitive remediation for schizophrenia. *Schizophr Res*. 2011 Feb;125(2–3):284–90.
14. Dickinson D, Tenhula W, Morris S, Brown C, Peer J, Spencer K, et al. A randomized, controlled trial of computer-assisted cognitive remediation for schizophrenia. *Am J Psychiatry*. 2010 Feb;167(2):170–80.
15. Donohoe G, Dillon R, Hargreaves A, Mothersill O, Castorina M, Furey E, et al. Effectiveness of a low support, remotely accessible, cognitive remediation training programme for chronic psychosis: cognitive, functional and cortical outcomes from a single blind randomised



- controlled trial. *Psychol Med.* 2018 Apr;48(5):751–64.
16. Drake RJ, Day CJ, Picucci R, Warburton J, Larkin W, Husain N, et al. A naturalistic, randomized, controlled trial combining cognitive remediation with cognitive-behavioural therapy after first-episode non-affective psychosis. *Psychol Med.* 2014 Jul;44(9):1889–99.
  17. Fisher M, Loewy R, Carter C, Lee A, Ragland JD, Niendam T, et al. Neuroplasticity-based auditory training via laptop computer improves cognition in young individuals with recent onset schizophrenia. *Schizophr Bull.* 2015 Jan;41(1):250–8.
  18. Fisher M, Mellon SH, Wolkowitz O, Vinogradov S. Neuroscience-informed auditory training in schizophrenia: A final report of the effects on cognition and serum brain-derived neurotrophic factor. *Schizophr Res Cogn.* 2016 Mar;3:1–7.
  19. Fiszdon JM, Choi KH, Bell MD, Choi J, Silverstein SM. Cognitive remediation for individuals with psychosis: efficacy and mechanisms of treatment effects. *Psychol Med.* 2016 Dec;46(16):3275–89.
  20. Garcia-Fernandez L, Cabot-Ivorra N, Rodriguez-Garcia V, Perez-Martin J, Dompablo M, Perez-Galvez B, et al. Computerized cognitive remediation therapy, REHACOM, in first episode of schizophrenia: A randomized controlled trial. *Psychiatry Res.* 2019 Nov;281:112563.
  21. Garrido G, Barrios M, Penadés R, Enríquez M, Garolera M, Aragay N, et al. Computer-assisted cognitive remediation therapy: Cognition, self-esteem and quality of life in schizophrenia. *Schizophr Res.* 2013 Nov;150(2–3):563–9.
  22. Gharaeipour M, Scott B. Effects of cognitive remediation on neurocognitive functions and psychiatric symptoms in schizophrenia inpatients. *Schizophr Res.* 2012 Dec 1;142(1):165–70.
  23. Gomar JJ, Valls E, Radua J, Mareca C, Tristany J, del Olmo F, et al. A Multisite, Randomized Controlled Clinical Trial of Computerized Cognitive Remediation Therapy for Schizophrenia. *Schizophr Bull.* 2015 Nov;41(6):1387–96.
  24. Greig T, Zito W, Wexler B, Fiszdon J, Bell M. Improved cognitive function in schizophrenia after one year of cognitive training and vocational services. *Schizophr Res.* 2007 Nov;96(1–3):156–61.
  25. Hodge MAR, Siciliano D, Withey P, Moss B, Moore G, Judd G, et al. A randomized controlled trial of cognitive remediation in schizophrenia. *Schizophr Bull.* 2010 Mar;36(2):419–27.
  26. Holzer L, Urban S, Passini CM, Jaugey L, Herzog MH, Halfon O, et al. A randomized controlled trial of the effectiveness of computer-assisted cognitive remediation (CACR) in adolescents with psychosis or at high risk of psychosis. *Behav Cogn Psychother.* 2014 Jul;42(4):421–34.
  27. Horan WP, Kern RS, Tripp C, Hellemann G, Wynn JK, Bell M, et al. Efficacy and specificity of Social Cognitive Skills Training for outpatients with psychotic disorders. *J Psychiatr Res.* 2011 Aug;45(8):1113–22.
  28. Iwata K, Matsuda Y, Sato S, Furukawa S, Watanabe Y, Hatsuse N, et al. Efficacy of cognitive rehabilitation using computer software with individuals living with schizophrenia: A randomized controlled trial in Japan. *Psychiatr Rehabil J.* 2017 Mar;40(1):4–11.
  29. Jahshan C, Vinogradov S, Wynn JK, Hellemann G, Green MF. A randomized controlled trial comparing a “bottom-up” and “top-down” approach to cognitive training in schizophrenia. *J Psychiatr Res.* 2019 Feb;109:118–25.
  30. Katsumi A, Hoshino H, Fujimoto S, Yabe H, Ikebuchi E, Nakagome K, et al. Effects of cognitive remediation on cognitive and social functions in individuals with schizophrenia.

- Neuropsychol Rehabil. 2019 Oct;29(9):1475–87.
31. Keefe RSE, Vinogradov S, Medalia A, Buckley PF, Caroff SN, D'Souza DC, et al. Feasibility and Pilot Efficacy Results from the Multi-site Cognitive Remediation in the Schizophrenia Trials Network (CRSTN) Study. *J Clin Psychiatry*. 2012 Jul;73(7):1016–22.
  32. Kidd SA, Kaur J, Virdee G, George TP, McKenzie K, Herman Y. Cognitive remediation for individuals with psychosis in a supported education setting: a randomized controlled trial. *Schizophr Res*. 2014 Aug;157(1–3):90–8.
  33. Kukla M, Bell MD, Lysaker PH. A randomized controlled trial examining a cognitive behavioral therapy intervention enhanced with cognitive remediation to improve work and neurocognition outcomes among persons with schizophrenia spectrum disorders. *Schizophr Res*. 2018 Jul;197:400–6.
  34. Kurtz MM, Seltzer JC, Shagan DS, Thime WR, Wexler BE. Computer-Assisted Cognitive Remediation in Schizophrenia: What is the Active Ingredient? *Schizophr Res*. 2007 Jan;89(1–3):251–60.
  35. Kurtz MM, Mueser KT, Thime WR, Corbera S, Wexler BE. Social skills training and computer-assisted cognitive remediation in schizophrenia. *Schizophr Res*. 2015 Mar;162(1–3):35–41.
  36. Lee RSC, Redoblado-Hodge MA, Naismith SL, Hermens DF, Porter MA, Hickie IB. Cognitive remediation improves memory and psychosocial functioning in first-episode psychiatric outpatients. *Psychol Med*. 2013 Jun;43(6):1161–73.
  37. Lindenmayer J-P, McGurk SR, Mueser KT, Khan A, Wance D, Hoffman L, et al. A randomized controlled trial of cognitive remediation among inpatients with persistent mental illness. *Psychiatr Serv Wash DC*. 2008 Mar;59(3):241–7.
  38. López-Luengo B, Vázquez C. Effects of Attention Process Training on cognitive functioning of schizophrenic patients. *Psychiatry Res*. 2003 Jul;119(1–2):41–53.
  39. Lu H, Li Y, Li F, Jiao X, Shi W, Guo K, et al. Randomized controlled trial on adjunctive cognitive remediation therapy for chronically hospitalized patients with schizophrenia. *Shanghai Arch Psychiatry*. 2012;24(3):149–54.
  40. Mak M, Samochowiec J, Tybura P, Bienkowski P, Karakiewicz B, Zaremba-Pechmann L, et al. The efficacy of cognitive rehabilitation with RehaCom programme in schizophrenia patients. The role of selected genetic polymorphisms in successful cognitive rehabilitation. *Ann Agric Environ Med [Internet]*. 2013 [cited 2020 Aug 23];20(1). Available from: <http://yadda.icm.edu.pl/yadda/element/bwmeta1.element.agro-f8ce606e-213f-45cd-9ff1-80554003aef0>
  41. McGurk SR, Mueser KT, Pascaris A. Cognitive Training and Supported Employment for Persons With Severe Mental Illness: One-Year Results From a Randomized Controlled Trial. *Schizophr Bull*. 2005 Jan 1;31(4):898–909.
  42. McGurk SR, Mueser KT, Xie H, Feldman K, Shaya Y, Klein L, et al. Cognitive remediation for vocational rehabilitation nonresponders. *Schizophr Res*. 2016 Aug;175(1–3):48–56.
  43. Medalia A, Aluma M, Tryon W, Merriam AE. Effectiveness of Attention Training in Schizophrenia. *Schizophr Bull*. 1998 Jan 1;24(1):147–52.
  44. Medalia A, Revheim N, Casey M. Remediation of memory disorders in schizophrenia. *Psychol Med*. 2000 Nov;30(6):1451–9.
  45. Mendella PD, Burton CZ, Tasca GA, Roy P, St Louis L, Twamley EW. Compensatory cognitive training for people with first-episode schizophrenia: results from a pilot randomized controlled trial. *Schizophr Res*. 2015 Mar;162(1–3):108–11.
  46. Moritz S, Veckenstedt R, Bohn F, Hottenrott B, Scheu F, Randjbar S, et al. Complementary group Metacognitive Training (MCT) reduces

- delusional ideation in schizophrenia. *Schizophr Res.* 2013 Dec;151(1–3):61–9.
47. Moritz S, Thoering T, Kühn S, Willenborg B, Westermann S, Nagel M. Metacognition-augmented cognitive remediation training reduces jumping to conclusions and overconfidence but not neurocognitive deficits in psychosis. *Front Psychol* [Internet]. 2015 Aug 3 [cited 2020 Aug 15];6. Available from: <http://journal.frontiersin.org/Article/10.3389/fpsyg.2015.01048/abstract>
  48. O'Reilly K, Donohoe G, O'Sullivan D, Coyle C, Corvin A, O'Flynn P, et al. A randomized controlled trial of cognitive remediation for a national cohort of forensic patients with schizophrenia or schizoaffective disorder. *BMC Psychiatry.* 2019 Jan 15;19(1):27.
  49. Omiya H, Yamashita K, Miyata T, Hatakeyama Y, Miyajima M, Yambe K, et al. Pilot study of the effects of cognitive remediation therapy using the frontal/executive program for treating chronic schizophrenia. *Open Psychol J* [Internet]. 2016 Oct 31;9. Available from: <http://search.ebscohost.com/login.aspx?direct=true&db=psyh&AN=2016-56925-001&site=ehost-live&scope=site>
  50. Ostergaard Christensen T, Vesterager L, Krarup G, Olsen BB, Melau M, Gluud C, et al. Cognitive remediation combined with an early intervention service in first episode psychosis. *Acta Psychiatr Scand.* 2014 Oct;130(4):300–10.
  51. Penadés R, Catalán R, Salamero M, Boget T, Puig O, Guarch J, et al. Cognitive Remediation Therapy for outpatients with chronic schizophrenia: A controlled and randomized study. *Schizophr Res.* 2006 Oct;87(1–3):323–31.
  52. Penades R, Pujol N, Catalan R, Massana G, Rametti G, Garcia-Rizo C, et al. Brain effects of cognitive remediation therapy in schizophrenia: a structural and functional neuroimaging study. *Biol Psychiatry.* 2013 May 15;73(10):1015–23.
  53. Penades R, Lopez-Vilchez I, Catalan R, Arias B, Gonzalez-Rodriguez A, Garcia-Rizo C, et al. BDNF as a marker of response to cognitive remediation in patients with schizophrenia: A randomized and controlled trial. *Schizophr Res.* 2018 Jul;197:458–64.
  54. Pontes LMM, Martins CB, Napolitano IC, Fonseca JR, Oliveira GMR, Iso SMK, et al. Cognitive training for schizophrenia in developing countries: a pilot trial in Brazil. *Schizophr Res Treat.* 2013;2013:321725.
  55. Popova P, Popov TG, Wienbruch C, Carolus AM, Miller GA, Rockstroh BS. Changing facial affect recognition in schizophrenia: effects of training on brain dynamics. *NeuroImage Clin.* 2014;6:156–65.
  56. Puig O, Penades R, Baeza I, De la Serna E, Sanchez-Gistau V, Bernardo M, et al. Cognitive remediation therapy in adolescents with early-onset schizophrenia: a randomized controlled trial. *J Am Acad Child Adolesc Psychiatry.* 2014 Aug;53(8):859–68.
  57. Ramsay IS. Neural impact of cognitive remediation for schizophrenia in a randomized controlled trial [Internet]. ProQuest Information & Learning; 2017. Available from: <http://search.ebscohost.com/login.aspx?direct=true&db=psyh&AN=2017-10863-047&site=ehost-live&scope=site>
  58. Rass O, Forsyth JK, Bolbecker AR, Hetrick WP, Breier A, Lysaker PH, et al. Computer-assisted cognitive remediation for schizophrenia: a randomized single-blind pilot study. *Schizophr Res.* 2012 Aug;139(1–3):92–8.
  59. Reeder C, Huddy V, Cella M, Taylor R, Greenwood K, Landau S, et al. A new generation computerised metacognitive cognitive remediation programme for schizophrenia (CIRCuiTS): a randomised controlled trial. *Psychol Med.* 2017 Sep 4;1–11.
  60. Royer A, Grosselin A, Bellot C, Pellet J, Billard S, Lang F, et al. Is there any impact of cognitive remediation on an ecological test in schizophrenia? *Cognit Neuropsychiatry.* 2012;17(1):19–35.

61. Sartory G, Zorn C, Groetzinger G, Windgassen K. Computerized cognitive remediation improves verbal learning and processing speed in schizophrenia. *Schizophr Res.* 2005 Jun;75(2-3):219-23.
62. Silverstein SM, Hatashita-Wong M, Solak BA, Uhlhaas P, Landa Y, Wilkniss SM, et al. Effectiveness of a two-phase cognitive rehabilitation intervention for severely impaired schizophrenia patients. *Psychol Med.* 2005 Jun;35(6):829-37.
63. Silverstein SM, Roche MW, Khan Z, Carson SJ, Malinovsky I, Newbill WA, et al. Enhancing and Promoting Recovery In Attentionally Impaired People Diagnosed With Schizophrenia: Results From A Randomized Controlled Trial Of Attention Shaping In A Partial Hospital Program. *Am J Psychiatr Rehabil.* 2014;17(3):272-305.
64. Tan B-L, King R. The effects of cognitive remediation on functional outcomes among people with schizophrenia: a randomised controlled study. *Aust N Z J Psychiatry.* 2013 Nov;47(11):1068-80.
65. Tan S, Zou Y, Wykes T, Reeder C, Zhu X, Yang F, et al. Group cognitive remediation therapy for chronic schizophrenia: A randomized controlled trial. *Neurosci Lett.* 2016 Jul 28;626:106-11.
66. Tan S, Zhu X, Fan H, Tan Y, Yang F, Wang Z, et al. Who will benefit from computerized cognitive remediation therapy? Evidence from a multisite randomized controlled study in schizophrenia. *Psychol Med.* 2019 Jul 12;1-11.
67. Thomas ML, Treichler EBH, Bismark A, Shiluk AL, Tarasenko M, Zhang W, et al. Computerized cognitive training is associated with improved psychosocial treatment engagement in schizophrenia. *Schizophr Res.* 2018 Dec;202:341-6.
68. Twamley EW, Vella L, Burton CZ, Heaton RK, Jeste DV. Compensatory cognitive training for psychosis: effects in a randomized controlled trial. *J Clin Psychiatry.* 2012 Sep;73(9):1212-9.
69. Vauth R, Corrigan PW, Clauss M, Dietl M, Dreher-Rudolph M, Stieglitz R-D, et al. Cognitive strategies versus self-management skills as adjunct to vocational rehabilitation. *Schizophr Bull.* 2005 Jan;31(1):55-66.
70. Wölwer W, Frommann N, Halfmann S, Piaszek A, Streit M, Gaebel W. Remediation of impairments in facial affect recognition in schizophrenia: Efficacy and specificity of a new training program. *Schizophr Res.* 2005 Dec;80(2-3):295-303.
71. Wykes T, Reeder C, Corner J, Williams C, Everitt B. The Effects of Neurocognitive Remediation on Executive Processing in Patients With Schizophrenia. *Schizophr Bull.* 1999 Jan 1;25(2):291-307.
72. Wykes T, Newton E, Landau S, Rice C, Thompson N, Frangou S. Cognitive remediation therapy (CRT) for young early onset patients with schizophrenia: an exploratory randomized controlled trial. *Schizophr Res.* 2007 Aug;94(1-3):221-30.
73. Wykes T, Reeder C, Landau S, Everitt B, Knapp M, Patel A, et al. Cognitive remediation therapy in schizophrenia: randomised controlled trial. *Br J Psychiatry J Ment Sci.* 2007 May;190:421-7.
